1     **The C-terminal PARP domain of the long ZAP isoform contributes essential**  
2             **effector functions for CpG-directed antiviral activity**

3

4     Dorota Kmiec, Maria-José Lista-Brotos, Mattia Ficarelli, Chad M Swanson\*, Stuart  
5                                     JD Neil\*

6     Department of Infectious Diseases, King's College London, London, United Kingdom

7             \* Correspondence: [chad.swanson@kcl.ac.uk](mailto:chad.swanson@kcl.ac.uk) and [stuart.neil@kcl.ac.uk](mailto:stuart.neil@kcl.ac.uk)

8

9

10 **Abstract:**

11 The zinc finger antiviral protein (ZAP) is a broad inhibitor of virus replication. Its best-  
12 characterized function is to bind CpG dinucleotides present in viral RNA and, through  
13 the recruitment of TRIM25, KHNYN and other cellular RNA degradation machinery,  
14 target them for degradation or prevent their translation. ZAP's activity requires the N-  
15 terminal RNA binding domain that selectively binds CpG-containing RNA. However,  
16 much less is known about the functional contribution of the remaining domains.

17 Using ZAP-sensitive and ZAP-insensitive human immunodeficiency virus type I (HIV-  
18 1), we show that the catalytically inactive poly-ADP-ribose polymerase (PARP)  
19 domain of the long ZAP isoform (ZAP-L) is essential for CpG-specific viral restriction.  
20 Mutation of a crucial cysteine in the C-terminal CaaX box that mediates S-  
21 farnesylation and, to a lesser extent, the inactive catalytic site triad within the PARP  
22 domain, disrupted the activity of ZAP-L. Addition of the CaaX box to ZAP-S partly  
23 restored antiviral activity, explaining why ZAP-S lacks CpG-dependent antiviral  
24 activity despite conservation of the RNA-binding domain. Confocal microscopy  
25 confirmed the CaaX motif mediated localization of ZAP-L to vesicular structures and  
26 enhanced physical association with intracellular membranes. Importantly, the PARP  
27 domain and CaaX box together modulate the interaction between ZAP-L and its  
28 cofactors TRIM25 and KHNYN, implying that its proper subcellular localisation is  
29 required to establish an antiviral complex. The essential contribution of the PARP  
30 domain and CaaX box to ZAP-L's CpG-directed antiviral activity was further  
31 confirmed by inhibition of severe acute respiratory syndrome coronavirus 2 (SARS-  
32 CoV-2) replication. Thus, compartmentalization of ZAP-L on intracellular membranes  
33 provides an essential effector function in the ZAP-L-mediated antiviral activity. **(258**  
34 **words out of 300)**

35

36

37 **Author summary**

38 Cell-intrinsic antiviral factors, such as the zinc-finger antiviral protein (ZAP), provide a  
39 first line of defence against viral pathogens. ZAP acts by selectively binding CpG  
40 dinucleotide-rich RNAs, which are more common in some viruses than their vertebrate  
41 hosts, leading to their degradation. Here, we show that the ability to target these  
42 foreign elements is not only dependent on ZAP's N-terminal RNA-binding domain, but  
43 additional determinants in the central and C-terminal regions also regulate this  
44 process. The PARP domain and its associated CaaX box, are crucial for ZAP's CpG-  
45 specific activity and required for optimal binding to cofactors TRIM25 and KHNYN.  
46 Furthermore, a CaaX box, known to mediate post-translational modification by a  
47 hydrophobic S-farnesyl group, caused re-localization of ZAP from the cytoplasm and  
48 increased its association with intracellular membranes. This change in ZAP's  
49 distribution was essential for inhibition of both a ZAP-sensitized HIV-1 and SARS-CoV-  
50 2. Our work unveils how the determinants outside the CpG RNA-binding domain assist  
51 ZAP's antiviral activity and highlights the role of S-farnesylation and membrane  
52 association in this process. **(170 words out of 200)**

53

54 **Introduction:**

55 Cell-intrinsic antiviral factors are an important line of defence against viral pathogens.  
56 Although diverse in structure and function, these proteins often share common  
57 characteristics including broad antiviral activity conferred by targeting common  
58 aspects of viral replication, interferon-stimulated gene expression and rapid evolution  
59 due to selective pressures imposed by pathogens [1]. The zinc finger antiviral protein  
60 (ZAP) is a broadly active antiviral protein that is induced by both type I and II  
61 interferons and is under positive selection in primates [2][3][4][5]. It restricts reverse  
62 transcribing viruses, RNA viruses and DNA viruses as well as endogenous  
63 retroelements, with retroviruses and positive-strand RNA viruses being the most  
64 common viral systems to study ZAP [6].

65 ZAP's broad antiviral activity relies on binding viral RNA, thereby either  
66 inhibiting their translation and/or target them for degradation by interacting with cellular  
67 cofactors such as the 3'-5' exosome complex, TRIM25, KHNYN and OAS3-RNaseL  
68 [7][8][9][10][11][12][13][14][15]. There are four characterized ZAP isoforms, with the  
69 long (ZAP-L) and short (ZAP-S) isoforms being the most abundant [3][16]. All ZAP  
70 isoforms contain an N-terminal RNA-binding domain (RBD) and a central domain that  
71 binds poly(ADP)-ribose [7][17]. However, ZAP-L and ZAP-S differ in that ZAP-L  
72 contains a catalytically inactive C-terminal poly (ADP ribose) polymerase (PARP)  
73 domain [3]. ZAP distinguishes between self and non-self RNA at least in part by  
74 selectively binding CpG dinucleotides [18][19][20]. These are present at a low  
75 frequency in vertebrate genomes due to cytosine DNA methylation and spontaneous  
76 deamination of the 5-methylcytosine to thymine [21]. Many vertebrate viruses,  
77 including RNA viruses that do not have a DNA intermediate, also have a much lower  
78 CpG frequency than expected based on the mononucleotide composition of the viral

79 RNAs and this is likely to be due at least in part to restriction by ZAP  
80 [22][18][23][24][25].

81 ZAP was originally identified as a restriction factor for murine leukemia virus  
82 and can target several different retroviruses including primary isolates of HIV-1  
83 [7][8][26][27][28]. ZAP more efficiently targets CpGs in the 5' region of HIV-1 *env* than  
84 other regions of the viral genome and introducing CpGs into this region creates a  
85 highly ZAP-sensitive HIV-1 [18][14][28]. This model ZAP-sensitive virus has been used  
86 to discover and characterize ZAP cofactors such as TRIM25 and KHNYN [14][29].  
87 While the RNA binding domain (RBD) of ZAP is crucial for its selectivity [19][20], much  
88 less is known about the functional relevance of the other domains and motifs.

89 We aimed to determine the functional relevance of ZAP's domains and their  
90 contribution to the mechanism of CpG-specific antiviral activity. In addition to the RBD,  
91 we identified that the PARP domain and CaaX box found in ZAP-L, but not ZAP-S, are  
92 required for antiviral activity against CpG-enriched HIV-1 and SARS-CoV-2, explaining  
93 why ZAP-L is much more antiviral against these viruses than ZAP-S. Both the PARP  
94 domain and CaaX box were required for optimal interaction with ZAP cofactors  
95 KHNYN and TRIM25. Our findings explain the difference in activity between the two  
96 main isoforms of ZAP and highlight the functional contribution of C-terminal regions to  
97 the control of important human pathogens such as HIV-1 and SARS-CoV-2.

98

99

100

101

102

## 103 **Results**

### 104 **Both the RNA-binding domain and C-terminal domains of ZAP contribute to its** 105 **CpG specific activity**

106 Full-length ZAP contains an RNA binding domain consisting of four zinc finger  
107 domains, a central domain comprised of a fifth CCCH zinc finger, two WWE domains  
108 and a C-terminal PARP domain (Fig 1A)[7][10][3][17]. Early studies using rat ZAP  
109 suggested that an N-terminal portion of the protein containing the four zinc fingers is  
110 sufficient for antiviral activity against murine leukemia virus (MLV) and Sindbis virus  
111 [7][30]. However, this was characterised using overexpression experiments in cells  
112 expressing endogenous ZAP and the endogenous and exogenous proteins could  
113 multimerise [31][32], complicating the experimental interpretation. To compare how  
114 much of ZAP's activity can be attributed to the RBD itself, we initially tested two  
115 truncation mutants of the protein, containing either the first 256 amino acids or the last  
116 649 amino acids in ZAP CRISPR KO HEK293T cells. Co-transfection of full-length  
117 ZAP with wild type HIV-1 NL4-3 or HIV-1<sub>env86-561</sub>CpG (mutant containing additional 36  
118 CpG dinucleotides introduced into *env* nucleotides 86–561 [14], referred to in this  
119 manuscript as HIV-1 CpG-high) resulted in a modest inhibition at the highest  
120 concentration. In contrast, a potent dose-dependent inhibition of HIV-1 CpG-high was  
121 observed with wild type ZAP (Fig 1B dashed lines). The N-terminal or C-terminal  
122 portions of ZAP did not inhibit infectious virus yield, virion production or viral protein  
123 expression (Fig 1B right panel and Fig S1A). In line with previous reports [4][31] the  
124 phenotype of RBD deletion could be phenocopied by five alanine substitutions in the  
125 proposed RNA binding groove (V72/Y108/F144/H176/R189 – 5xRBM) [4] (Fig 1C).  
126 Moreover, mutation of residues that directly interact with a CpG dinucleotide, Y108A  
127 or F144A, abolished ZAP antiviral activity for HIV-1 CpG-high [19][20]. Of note, these

128 mutations have been reported to relax the CpG-specificity for ZAP antiviral activity on  
129 HIV- 1 [19]. However, we did not observe antiviral activity for ZAP Y108A or F144A on  
130 wild type HIV-1 (Fig 1C-D), which is consistent with the complete loss of function  
131 phenotype for these mutations previously observed for Sindbis virus [20]. Thus, the  
132 RBD of ZAP is essential yet insufficient for CpG-mediated restriction of HIV-1, implying  
133 important effector functions elsewhere in the protein.

134 To determine domains required for CpG-specific antiviral activity outside the  
135 RBD, we tested ZAP mutants carrying deletions in the central domains (ZnF5 and  
136 WWE1 or WWE2) or the PARP domain (Fig 2A). While deletions in the central domain  
137 partly reduced ZAP antiviral activity, deletion of the PARP domain resulted in an  
138 almost complete loss of CpG-specific inhibition (Fig 2A and B). All PARP proteins  
139 except for ZAP (PARP13) and PARP9 can catalyse the transfer of ADP-ribose to  
140 target proteins [33]. This lack of catalytic ability has been suggested to be caused by  
141 a deviation from the conserved triad motif “HYE” that is required for NAD<sup>+</sup> cofactor  
142 binding and PARP catalytic activity as well as the partial occlusion of the active site by  
143 a salt bridge between H809 and Y824 on one side, and a short alpha helix between  
144 residues 803 and 807 at the other [34][35]. Interestingly, residues found to be under  
145 strong positive selection in primates (Y793, S804, F805) - often a hallmark of  
146 pathogen-host interactions - are located in this alpha helix [3] (Fig 2C). Also, while  
147 ZAP orthologs from some tetrapods appear to have an intact catalytic motif similar to  
148 PARP12, substitutions in the human ZAP’s PARP domain within the canonical NAD<sup>+</sup>  
149 binding site prevent the protein from binding this substrate [29][34]. Despite this,  
150 mutation of the residues that are present in the triad motif positions, Y786, Y818 and  
151 V875 to alanine or H-Y-E abolishes ZAP’s inhibition of Sindbis virus [35], suggesting  
152 that the structural integrity of the ZAP PARP domain provides important function.

153 To determine if these residues modulate CpG-specific antiviral activity and  
154 explain the apparent lack of inhibition by C-terminally truncated ZAP, we mutated  
155 ZAP's residues 786, 818, 875 (canonical triad positions, pink) and 793, 804 and 805  
156 (sites under positive selection, green) within the PARP domain (Fig 2C). Mutation of  
157 the Y786, Y818 and V875 to alanine resulted in a large loss of antiviral function (Fig  
158 2D and 2E) though this was also associated with a substantial decrease in ZAP  
159 expression (Fig 2E). Mutation of these residues to H-A-E did not alter ZAP expression  
160 but led to a significant loss of antiviral activity. Meanwhile, alanine substitutions at  
161 positions under positive selection did not affect the antiviral phenotype (Fig 2D).  
162 Therefore, the residues in these positions in ZAP-L that constitute the triad motif in  
163 catalytically active PARPs, but not the rapidly evolving residues within the PARP  
164 domain, contribute to CpG-specific viral inhibition. However, this does not fully account for  
165 the loss of phenotype observed with deletion of ZAP's C-terminus ( $\Delta$ PARP).

### 166 **The C-terminal CaaX box is crucial for ZAP antiviral activity against CpG-** 167 **enriched HIV-1**

168 While ZAP-L has been reported to be more active than ZAP-S lacking the C-terminal  
169 domain (Fig 3A) against at least some viruses, this remains contested and may be  
170 virus-specific [3][5][36][37][38][39][40][41]. In agreement with data obtained with the  
171 C-terminally truncated mutant  $\Delta$ PARP (Fig 2), ZAP-S displayed no significant CpG-  
172 specific HIV-1 antiviral activity (Fig 3B). We also tested whether co-expression of both  
173 isoforms could have synergistic activity and found that ZAP-S had no significant effect  
174 on the CpG-high HIV-1 virus even in the presence of ZAP-L (Fig S2).

175 The ZAP-L PARP domain ends with a well-conserved CVIS sequence that  
176 forms a CaaX box (Fig S3B), which mediates a C-terminal post-translational  
177 modification through the addition of hydrophobic S-farnesyl group [41]. To evaluate



178 the contribution of the S-farnesylation motif, we mutated the cysteine in the ZAP-L  
179 CaaX box to serine (C899S) and added the CaaX box to ZAP-S (ZAP-S + CVIS). The  
180 C899S mutation in ZAP-L completely abolished its antiviral activity while addition of  
181 the CaaX box to the C-terminus of ZAP-S resulted in a substantial increase in inhibition  
182 of HIV-1 CpG-high (Fig 3B-C). Thus, the CaaX box is essential for ZAP antiviral activity  
183 on CpG-enriched HIV-1 and can significantly enhance ZAP-S activity even in the  
184 absence of the PARP domain. We also analysed whether the N-terminus of ZAP was  
185 sufficient for antiviral activity in the presence of the CaaX box. The CVIS motif was  
186 added to the first 256 or 352 amino acids of ZAP. The addition of the CVIS motif to  
187 ZAP 1-352 led to a partial rescue of CpG-specific activity, comparable to that observed  
188 in the case of ZAP-S + CVIS (Fig 3D), though it did not add antiviral activity to ZAP 1-  
189 256, suggesting that there might be additional determinants of antiviral function  
190 present in the 256-352 region. Because the closest paralogue to ZAP, PARP12, does  
191 not share a conserved CpG binding motif or CaaX motif found in mammalian and bird  
192 ZAPs (Fig S3A and B), we tested the wild type and modified protein containing CVIS  
193 motif (PARP12 + CVIS) by overexpression in ZAP KO HEK293T cells (Fig 4A-D).  
194 PARP12 had no antiviral activity against either WT or CpG-enriched HIV-1, and the  
195 addition of ZAP's CaaX or RBD was not sufficient to promote a gain of function  
196 phenotype. However, a chimeric PARP12 containing the ZAP RBD in addition to the  
197 CaaX box gained partial antiviral phenotype similar to ZAP 1-352 + CVIS, highlighting  
198 functional differences between these paralogs in both the RNA binding domain and  
199 the C-terminal PARP-domain govern antiviral function.

200 ZAP-L S-farnesylation has been hypothesized to direct it to endocytic  
201 membranes to target incoming viruses that enter cells through endocytic pathways  
202 and replicate in viral replication compartments derived from cellular membrane

203 invaginations, such as Sindbis virus [41][42][37]. However, the experiments above  
204 tested ZAP antiviral activity on transfected provirus constructs, which effectively start  
205 the viral replication cycle at gene expression and bypasses viral entry and the other  
206 pre-integration steps. Furthermore, HIV-1 does not replicate in compartments formed  
207 from cellular membranes like positive strand RNA viruses. Therefore, the CaaX box  
208 cannot be required for ZAP-L to target incoming HIV-1 and intracellular membranes  
209 could be used as a platform to establish an antiviral complex. To confirm that ZAP  
210 localization to membranes was dependent on the CaaX motif, we generated GFP-  
211 tagged versions of wild type and mutant ZAP. Importantly, the GFP-tag did not  
212 interfere with ZAP-L antiviral activity (Fig S4). Confocal microscopy of live HEK293T  
213 ZAP KO cells transfected with GFP-ZAP (Fig 5A) showed that ZAP-S localized mainly  
214 to the cytoplasm, while ZAP-L accumulated in the intracellular vesicular compartments  
215 [41][37]. The localization pattern for ZAP-L and ZAP-S was reversed for ZAP-L C899S  
216 and ZAP-S + CVIS, respectively. Therefore, vesicular localization appears to correlate  
217 with antiviral activity for CpG-enriched HIV-1 (compare Fig 3B and 5A). By contrast,  
218 both GFP-ZAP-L and GFP-ZAP-S localized to stress granules defined by G3BP  
219 puncta upon poly(I:C) transfection and this was not affected by mutation or transfer of  
220 the CaaX box (Fig S5). To determine if the localization observed in the microscopy  
221 experiments was also linked to the increased association of ZAP with cellular  
222 membranes, we isolated the cytoplasmic (C), membrane (M) and insoluble fractions  
223 (D) of HEK293T cells and found that ZAP-L, but not ZAP-S, was present in the  
224 membrane enriched fraction. This association could be disrupted by washing the cell  
225 lysates in 0.5M salt buffer, while such treatment did not affect membrane association  
226 of calnexin (Fig S6), suggesting that ZAP farnesylation mediates only a weak  
227 association with the cytoplasmic face of target membranes. Isolation of cytoplasmic

228 and membrane fractions from ZAP-transfected KO HEK293T cells confirmed that  
229 while ZAP-L was present at comparable levels in both fractions, the distribution of the  
230 ZAP-L C899S mutant resembled that of cytoplasmic ZAP-S, G3BP and GAPDH (Fig  
231 5C). However, while ZAP-S-CVIS relocates to resemble ZAP-L localization, its  
232 membrane association failed to survive the subcellular fractionation, suggesting a  
233 weaker interaction. This, in keeping with its only partial gain of antiviral activity (Fig  
234 3B), further indicates the importance of the integrity of the PARP domain in ZAP-L  
235 activity.

236 We then determined whether ZAP targeting to intracellular membranes is  
237 required for its interaction with ZAP cofactors to mediate its antiviral activity against  
238 CpG-enriched HIV-1. Pulldown of GFP-tagged ZAP isoforms and mutants revealed  
239 that ZAP-L coimmunoprecipitated with endogenous KHNYN more efficiently than  
240 ZAP-S, and the 1-256 and 1-352 truncation mutants bound even lower levels of  
241 KHNYN (Fig 6A and B). The same pattern was observed for TRIM25. ZAP-S  
242 containing the CaaX box showed a gain of interaction with the cofactors. However,  
243 even without the functional CaaX box, ZAP-L bound more KHNYN than ZAP-S,  
244 indicating that both S-farnesylation, as well as the PARP domain itself, likely play  
245 important roles in this interaction.

246

## 247 **The CaaX box and PARP domain are required for ZAP antiviral activity against** 248 **SARS-CoV-2**

249 Having established determinants of ZAP required to restrict a virus that produces its  
250 RNAs in the nucleus, we then sought to confirm these data with an RNA virus that  
251 replicates exclusively in the cytoplasm. SARS-CoV-2 has recently been reported to  
252 be restricted by ZAP, particularly after exposure of cells to interferon gamma [5], and

253 replicates in double membrane vesicle compartments derived from the ER [43], in  
254 contrast to the Sindbis virus replication compartments created by membrane  
255 invaginations in the plasma and endosomal membranes [42]. To test if ZAP  
256 determinants required to inhibit CpG-enriched HIV-1 also are required for the  
257 restriction of SARS-CoV-2, we co-transfected ZAP KO HEK293T cells with plasmids  
258 encoding human ACE2 and the indicated ZAP isoform or mutant protein, followed by  
259 infection with SARS-CoV-2 at MOI 0.01. Detection of intracellular N protein and viral  
260 RNA in the supernatants two days post-infection confirmed that ZAP-S restricts this  
261 virus to a far lesser degree than ZAP-L (Fig 7) [5]. ZAP-L restriction was completely  
262 abolished when the CaaX box was mutated and transferring this motif to ZAP-S  
263 significantly increased its antiviral activity. ZAP-L also required the CpG binding  
264 residue Y108 and the YYV motif in place of the PARP catalytic triad for full antiviral  
265 activity against SARS-CoV-2. Thus, the determinants of restriction for ZAP-L are  
266 similar for a retrovirus that does not replicate on cellular membranes and SARS-CoV-2  
267 which replicates in viral replication compartments derived from the ER.

268

## 269 **Discussion**

270 In this study, we demonstrate that in a robust knockout cell-based system ZAP-L, but  
271 not ZAP-S, can efficiently inhibit both a CpG enriched HIV-1 as well as SARS CoV-2.  
272 We further demonstrate that the C-terminal PARP domain, and particularly its  
273 associated farnesylation motif, is essential for this differential activity. Interestingly,  
274 while ZAP-L and ZAP-S are derived through alternative splicing and polyadenylation,  
275 ZAP-L is expressed constitutively in most cells, whereas ZAP-S expression is more  
276 variable and upregulated by type 1 and 2 interferons. Several studies, including this  
277 one, have shown that human ZAP-L has more potent antiviral function than ZAP-S for

278 alphaviruses, retroviruses and coronaviruses [3][41][16][37]. However, human ZAP-S  
279 clearly has potent antiviral activity for some viruses, such as human cytomegalovirus,  
280 when it is the only isoform expressed [44][16][5][45]. Both ZAP-L and ZAP-S have  
281 been shown to regulate cellular mRNA expression, so the different isoforms may have  
282 differential activity, depending on the transcript [46][47][4][37]. Interestingly, in the  
283 context of our experimental system, ZAP-S has no antiviral activity on its own, nor  
284 does it augment or interfere with the activity of ZAP-L.

285         While both ZAP-L and ZAP-S differ only at the C-terminus, their N-terminal  
286 RBDs are identical. Within this four zinc finger domain, ZnF2 specifically  
287 accommodates a CpG in its binding pocket, and mutation of the contact residues in  
288 ZAP-L that define this specificity abolish CpG-dependent restriction of both HIV-1 and  
289 SARS CoV-2. This contrasts with a previous study that suggested that such mutations  
290 at Y108 and F144 lose their specificity for CpG, but broaden ZAPs antiviral activity to  
291 wild-type HIV-1 sequences [19]. The reason for this discrepancy is unclear, although,  
292 the previous study did involve the ectopic expression of TRIM25 in a TRIM25/ZAP  
293 double knockout cell. Furthermore, as expected from the lack of antiviral activity for  
294 ZAP-S, neither the core RBD alone (1-256) or an extended version (1-352) have  
295 antiviral activity. Thus, while essential for RNA-binding and CpG specificity, the RBD  
296 likely has no intrinsic antiviral activity alone at physiological expression levels. A recent  
297 preprint has suggested that ZAP-S can inhibit SARS CoV-2 by negatively regulating  
298 the -1 frameshift between Orf1a and Orf1b [48]. Consistent with this, we do see a small  
299 reduction in N expression in infected cells expressing ZAP-S alone, but it is insufficient  
300 to significantly impact viral production in the supernatant. The Y108A mutant in ZAP-  
301 L substantially reduced antiviral activity against SARS CoV-2 indicating that ZAP-L  
302 targets SARS CoV-2 via CpG dinucleotides.

303           The C-terminal PARP domain of ZAP-L is catalytically inactive but ends with a  
304 CaaX-box farnesylation motif, CVIS. The CVIS sequence mediated ZAP-L  
305 relocation from the cytoplasm to intracellular membranes. This association  
306 appears relatively weak, in line with evidence that protein farnesylation itself is not  
307 sufficient for stable association with membranes [49][50]. As such, this may suggest a  
308 dynamic exchange of ZAP-L between membrane binding and the cytosol would allow  
309 ZAP-L also to localize to cytoplasmic stress granules [4][46]. ZAP-L has been shown  
310 to localize to endosomal compartments, but other studies have also indicated that ZAP  
311 associates with the ER and nuclear membranes as well [51][41][4][37]. Appending the  
312 CaaX box to ZAP-S and even the ZAP 1-352 fragment was sufficient to confer antiviral  
313 activity against both against CpG-enriched HIV-1 or SARS CoV-2, in agreement with  
314 previous data with Sindbis virus [37]. However, given that the HIV-1 RNA is being  
315 targeted after transcription and export from the nucleus, and SARS CoV-2 during  
316 exclusively cytoplasmic replication, it is unlikely that ZAP farnesylation is targeting  
317 incoming viruses or specific membrane bound replication compartments per se as has  
318 been suggested for Sindbis virus, especially considering the differences between  
319 alphavirus and coronavirus replication compartments. Rather, farnesylation is more  
320 likely to allow compartmentalization or assembly of macromolecular complexes on  
321 non-self CpG-rich viral RNAs to facilitate their downstream inactivation irrespective of  
322 the subcellular location of viral replication itself. In keeping with this notion, our data  
323 indicates the Caax-box modulates the efficiency of interaction with the essential ZAP  
324 cofactors TRIM25 and KHNYN. Lipid modification is a common feature of other  
325 antiviral proteins including GBP2, GBP5 and the dsRNA sensor OAS1 and is also  
326 required for their antiviral function [52][53][54][55]. Moreover, the relocation of DNA  
327 and RNA sensors such as STING and MAVS from the ER or mitochondrial

328 membranes to endolysosomes is coupled to their pattern recognition activities [56].  
329 Importantly, while stress granules have been suggested as a site of ZAP's antiviral  
330 activity [32], the lack of requirement for the CVIS in this localization argues against  
331 their function as a platform for ZAP-L-mediated restriction.

332         Similar to ZAP's RBD, the CaaX motif appears to be extremely well conserved  
333 in mammals and even birds. A recent study suggested that avian ZAP RBD has lower  
334 CpG-specificity than mammalian proteins [29]. It is thus likely that the evolution of  
335 CaaX happened after the duplication of genes that gave rise to PARP12 and ZAP, but  
336 still preceded the RBD adaptations that enabled efficient CpG-specific viral inhibition.  
337 While the CVIS is essential for ZAP-L activity, appending it to ZAP-S or a ZAP-RBD-  
338 PARP12 fusion is not sufficient to confer full antiviral activity. This implies that the  
339 catalytically inactive PARP, in conjunction with the ZnF5 and WWE domains, plays an  
340 important role in ZAP-L function. The two WWE domains and ZnF5 have been a  
341 subject of recent pre-print showing that these two regions combine into a single  
342 integrated domain that binds ADP-ribose, which facilitates antiviral activity[17].  
343 Furthermore, ZAP was also shown to be mono-ADP-ribosylated by PARP14 and  
344 PARP7 [57][58]. Therefore, ZAP is potentially a target for ADP-ribosylation by multiple  
345 PARP proteins which can regulate its activity, but it cannot perform this function on its  
346 own due to mutations within its PARP domain. We found that residues forming what  
347 would be the catalytic triad motif in active PARP domains contribute to ZAP's antiviral  
348 function. It is tempting to speculate that the evolution of CpG-specific antiviral activity  
349 enhanced by the PARP domain in ZAP led to, or was a consequence of, the loss of its  
350 own ADP ribosylation ability. Despite the inactive catalytic site being occluded in the  
351 ZAP PARP domain, mutation of the residues that would form the active site modulates  
352 ZAP-L activity and stability, suggesting structural integrity of the PARP domain may

353 facilitate cofactor interactions and/or multimeric assembly on target RNAs. Validation  
354 of such hypotheses awaits a full structure of ZAP rather than its constituent domains.

355 In summary, we show that ZAP-L localization to membranes and the integrity  
356 of its C-terminal PARP domain facilitate cofactor recruitment provide an essential  
357 antiviral effector function in the context of its ability to bind CpG dinucleotides in viral  
358 RNAs.

359

## 360 **Materials and Methods**

### 361 **Expression constructs and cloning**

362 Previously described pcDNA3.1 HA-ZAP-L and ZAP-S constructs [24] were rendered  
363 CRISPR-resistant by introducing synonymous mutations within exon 6. Primers were  
364 synthesized by Eurofins, and all PCRs were performed with Q5 High Fidelity DNA  
365 Polymerase (NEB). Monomeric enhanced GFP fused to N-terminus of ZAP via a  
366 flexible linker (GGGGSGGGGSGGGG) was synthesized by Genewiz and the full-  
367 length ZAP cDNA was reconstituted using an internal PstI site. Specific mutations and  
368 deletions were generated using Q5 site-directed mutagenesis or Gibson Assembly  
369 (NEB) cloning. pcDNA3.1 HA-PARP12 was generated by PCR amplifying the PARP12  
370 coding sequence (Dharmacon) and ligating into EcoRI/EcoRV sites of pcDNA3.1 using  
371 T4 DNA ligase (NEB). Construct sequence identity was confirmed by restriction  
372 enzyme digestion and Sanger sequencing (Genewiz). pHIV-1<sub>NL4-3</sub> and pHIV-1<sub>env86-</sub>  
373<sub>561</sub>CpG were described before [14][23]. pcDNA N-terminally C9-tagged human ACE2  
374 construct was kindly provided by Dr Nigel Temperton.

### 375 **Cell lines and culture**



376 Human Embryonic Kidney (HEK) 293T cells were obtained from the American Type  
377 Culture Collection (ATCC). Hela and HEK293T CRISPR ZAP KO (exon 6) cells were  
378 described previously [14][24]. TZM-bl reporter cells (kindly provided by Drs Kappes  
379 and Wu and Tranzyme Inc. through the NIH AIDS Reagent Program) express CD4,  
380 CCR5 and CXCR4 and contain the  $\beta$ -galactosidase genes under the control of the  
381 HIV-1 promoter [59][60]. Cells were cultured in Dulbecco's modified Eagle medium  
382 with GlutaMAX (Gibco) supplemented with 10% fetal calf serum (FCS), 100 U/ml  
383 penicillin and 100  $\mu$ g/ml streptomycin, and grown at 37°C in a humidified atmosphere  
384 with 5% CO<sub>2</sub>.

### 385 **Transfection and HIV-1 infectivity assay**

386 HEK293T ZAP KO cells (0.15-0.2mln) were seeded in 24-well plates and transfected  
387 the following day using PEI MAX (3:1 PEI to DNA ratio; Polysciences) with 500 ng  
388 pHIV-1 and 0-250 ng pcDNA3.1 protein expression construct. The total amount of  
389 DNA was normalized to 1  $\mu$ g using pcDNA3.1 GFP vector. Media was changed the  
390 following day and cell-free virus-containing supernatants and cells were harvested two  
391 days post-transfection. To measure infectious virus yield, 10,000/well TZM-bl cells  
392 were seeded in a 96-well plate and infected in triplicate. Two days later, viral infectivity  
393 was determined using the Gal-Screen kit (Applied Biosystems) according to  
394 manufacturer's instructions.  $\beta$ -galactosidase activity was quantified as relative light  
395 units per second using a microplate luminometer.

### 396 **SARS-CoV-2 infection**

397 HEK293T ZAP KO cells (0.2 mln) were seeded in 12-well plates. The following day,  
398 the cells were transfected using PEI MAX with 100 ng pcDNA C9-ACE2 and either  
399 400 ng pcDNA ZAP or GFP control vector. At 24 hours post-transfection, the cells

400 were infected with SARS-CoV-2 England 2 virus strain at MOI 0.01 (prepared and  
401 tested as previously described in [61][62]. After 1 hour (h), cells were washed in PBS  
402 to remove the inoculum. Virus-containing cell-free supernatants and cell lysates were  
403 harvested two days later.

#### 404 **Quantitative Real-Time PCR**

405 RNA from infected cell supernatants was extracted using QIAamp viral RNA mini kit  
406 (Qiagen) and cDNA was synthesized using the High Capacity cDNA RT kit (Thermo)  
407 following the manufacturer's instructions. The relative quantity of nucleocapsid (N)  
408 RNA was measured using a SARS-CoV-2 (2019-nCoV) CDC qPCR N1 and control  
409 RNaseP probe set (IDT DNA Technologies). qPCR reactions were performed in  
410 duplicates with Taqman Universal PCR mix (Thermo) using the Applied Biosystems  
411 7500 real-time PCR system. Relative SARS-CoV-2 RNA amounts were calculated  
412 using the  $\Delta\Delta C_t$  method.

#### 413 **SDS-PAGE and immunoblotting**

414 HIV-1 virions were concentrated by centrifugation at 18,000 RCF through a 20%  
415 sucrose cushion for 1.5 hours at 4°C. Cells were lysed in radioimmunoprecipitation  
416 assay (RIPA) buffer containing cOmplete EDTA-free protease inhibitor (Roche) and  
417 10U/ml benzonase nuclease (Santa Cruz). Cell lysates and concentrated virions were  
418 then reduced in Laemmli buffer and boiled for 10min at 95°C. Samples were separated  
419 on gradient 8- 16% Mini-Protean TGX precast gels (Bio-Rad) and transferred onto  
420 0.45  $\mu$ m pore nitrocellulose. Membranes were blocked in 5% milk and probed with  
421 mouse anti-HA (#901514, Biologend), rabbit anti-HA (#C29F4, Cell Signalling), rabbit  
422 anti-GAPDH (#AC027, Abclonal), mouse anti-G3BP (#611126, BD), rabbit anti-  
423 calnexin (#ab22595, abcam), rabbit anti-ZAP (#GTX120134, GeneTex), rabbit anti-

424 GFP (#ab290, abcam), mouse anti-KHNYN (#sc-514168, SantaCruz), mouse anti-  
425 TRIM25 (#610570, BD), rabbit anti-SARS-CoV-2 N (#GTX135357, GeneTex), rabbit  
426 anti-ACE2 (#ab108209, abcam), mouse anti-HIV-1 p24 [63] or rabbit anti-HIV-1 Env  
427 (#ADP20421, CFAR), followed by secondary DyLight conjugated anti-mouse 800  
428 (#5257S, Cell Signalling), anti-rabbit 680 (5366S, Cell Signalling), HRP conjugated  
429 anti-mouse (#7076S, Cell Signalling) or anti-rabbit (#7074S, Cell Signalling). HRP  
430 chemiluminescence was developed using ECL Prime Reagent (Amersham). Blots  
431 were visualized using LI-COR and ImageQuant LAS 4000 Imagers.

### 432 **Co-immunoprecipitation**

433 HEK293T ZAP KO cells were seeded at 0.3-0.4 mln/ml in 10 cm dishes and  
434 transfected the following day with 10 µg pcDNA GFP or pcDNA GFP-ZAP plasmid  
435 using PEI MAX. Cells were harvested two days later and ZAP was immunoprecipitated  
436 using GFP-Trap magnetic agarose kit (Chromotek) following the manufacturer's  
437 instructions.

### 438 **Confocal microscopy**

439 For live-cell microscopy, ~75.000 HEK293T ZAP KO cells were seeded onto poly-  
440 Lysine coated 24-well glass-bottom plates and transfected with 250 ng pcDNA3.1  
441 GFP-ZAP using PEI MAX. Cells were visualized 24 h later using a 100x oil-immersion  
442 objective equipped Nikon Eclipse Ti-E inverted CSU-X1 spinning disk confocal  
443 microscope.

444 To visualize ZAP relocalization to stress-granules, ~50.000 Hela ZAP KO cells were  
445 seeded onto poly-Lysine coated 24-well glass-bottom plates and transfected with 125  
446 ng pcDNA encoding GFP-ZAP using LT1 transfection reagent. 40 h post-transfection,  
447 cells were transfected with 100 ng poly(I:C) using Lipofectamine 2000 (Invitrogen) and

448 fixed 6 h later in 2% PFA. Cells were blocked and permeabilized for 30min in PBS  
449 containing 0.1% TritonX and 5% Normal Donkey Serum (Abcam), stained overnight  
450 with mouse anti-G3BP (BD, #611126, 1:200 dilution), followed by 2 h staining with  
451 secondary donkey anti-mouse Alexa Fluor 546 antibody (Invitrogen, A10036, 1:500  
452 dilution) and 1 $\mu$ g/ml DAPI.

### 453 **Cell fractionation**

454 HEK293T and HEK293T ZAP KO cells (0.6-0.8 mln) were seeded in 6-well plates. The  
455 following day, ZAP KO cells were co-transfected using PEI MAX with 60 ng pcDNA  
456 HA-ZAP constructs and 940 ng pcDNA3.1 empty vector. Cells were harvested two  
457 days later, washed in PBS and processed using ProteoExtract Native Membrane  
458 Protein Extraction Kit (Sigma). Soluble cytoplasmic, membrane protein and insoluble  
459 fractions were isolated according to the manufacturer's instructions, with the addition  
460 of three 1 ml PBS or high salt washes between extraction buffer I and II. The insoluble  
461 debris fraction was resuspended in RIPA buffer, sonicated and reduced in Laemmli  
462 buffer by boiling at 95°C for 10min.

### 463 **ZAP sequence analysis**

464 Protein sequences of human ZAP-L orthologs were downloaded from the NCBI  
465 database (<https://www.ncbi.nlm.nih.gov/>). Sequences were aligned using ClustalW2  
466 (<https://www.ebi.ac.uk/Tools/msa/clustalw2/>) and logo plots were generated using  
467 WebLogo online tool (<https://weblogo.berkeley.edu/logo.cgi>) (ref).

### 468 **Data analysis**

469 The area under the curve (AUC) and statistical significance (unpaired two-tailed  
470 Student's t-test) were calculated using Prism Graph Pad. Data are represented as  
471 mean  $\pm$  SD.

472

473 **Acknowledgments**

474 We thank other members of the Neil and Swanson laboratories for helpful discussions  
475 as well as Dr Monica Agromayor and Prof. Juan Martin-Serrano and their group  
476 members for advice and assistance with confocal microscopy. We thank Nigel  
477 Temperton for generously providing reagents. The following reagents were obtained  
478 through the NIH AIDS Research and Reference Reagent Program, Division of AIDS,  
479 NIAID, NIH: TZM-bl from Dr John C Kappes, Dr Xiaoyun Wu and Tranzyme Inc; HIV-  
480 1 p24 Hybridoma (183-H12-5C) from Dr Bruce Chesebro and Dr Hardy Chen. The  
481 Antiserum to HIV-1 gp120 #20 (ARP421) was obtained from the NIBSC Centre for  
482 AIDS Reagents. This work was funded by a Deutsche Forschungsgemeinschaft  
483 (German Research Foundation) fellowship to DK (Project number: KM 5/1-1),  
484 Wellcome Trust Senior Research Fellowship (WT098049AIA) to SJDN, and Medical  
485 Research Council grant MR/S000844/1 to SJDN and CMS. This UK funded award is  
486 part of the EDCTP2 programme supported by the European Union. MF is supported  
487 by the UK Medical Research Council (MR/R50225X/1) and is a King's College London  
488 member of the MRC Doctoral Training Partnership in Biomedical Sciences. The  
489 funders had no role in study design, data collection and analysis, decision to publish,  
490 or preparation of the manuscript.

491

492

493

494

495

496

497 **Figure legends**

498 **Figure 1. RNA binding is crucial for ZAP's antiviral activity.** (A) Schematic  
499 showing domain organisation of long isoform of ZAP (ZAP-L): four N-terminal zinc  
500 fingers form RNA binding domain (RBD), fifth zinc finger (ZnF5) and two WWE  
501 domains are located in the central part and catalytically inactive Poly(ADP-ribose)  
502 polymerase (PARP) domain is at the C-terminal part. (B) Infectious virus yield  
503 measured by TZM-bl infectivity assay in relative light units per second [rlu/s] obtained  
504 from HEK293T ZAP KO cells co-transfected with wild type (WT; black) HIV-1 and  
505 CpG-enriched mutant (CpG-high; red) viruses and increasing doses of pcDNA HA-  
506 ZAP constructs encoding the full length ZAP-L (WT CTRL; dashed line), 1-256aa or  
507 253-902aa parts of the protein (solid lines) (left panel). Area Under the Curve (AUC)  
508 calculated from the same titration experiments (right panel). (C) Infectious virus yield  
509 from HEK293T ZAP KO co-transfected with WT and mutant virus and increasing  
510 concentration of pcDNA HA-ZAP with truncated ZAP 253-902 ( $\Delta$ RBD), ZAP-L mutant  
511 unable to bind RNA (V72A/Y108A/F144A/H176A/R189A; 5xRBM) or ZAP-L with  
512 substitutions at positions in direct contact with bound RNA CpG (Y108A and F144A)  
513 and (D, left panel) derived AUC values. Mean of n=3 +/- SD. Significant differences  
514 are indicated as: \* p < 0.05; \*\* p < 0.01. Stars directly above CpG virus values (red  
515 bars) indicate statistically significant difference as compared to WT virus (black bar)  
516 tested with the same ZAP variant and (right panel) representative western blot of  
517 produced virions and ZAP transfected (250ng) cells showing viral Env and Gag (p24)  
518 proteins as well as HA-tagged ZAP and GAPDH loading control.

519 **Figure 2. Determinants of ZAP's function located outside RBD.** (A) Infectious virus  
520 yield from HEK293T ZAP KO co-transfected with WT (black) and mutant (red) virus

521 and increasing concentration of pcDNA HA-ZAP-L control (WT CTRL, dashed line) or  
522 mutated pcDNA HA-ZAP with deleted ZnF5 and first WWE domain ( $\Delta$ 511-563;  
523  $\Delta$ ZnF5/WWE1), second WWE ( $\Delta$ 594-681;  $\Delta$ WWE2) or PARP domain ( $\Delta$ 716-902;  
524  $\Delta$ PARP). (B) Corresponding AUC values and representative western blot (250ng). (C)  
525 Position of studied residues in crystal structure of ZAP's PARP domain. Residues  
526 under positive selection in primates are shown in green, canonical triad positions in  
527 pink and residues forming the salt bridge which closes the NAD<sup>+</sup> binding groove are  
528 shown in yellow. (D) Infectious virus yield from HEK293T ZAP KO co-transfected with  
529 WT (black) and mutant (red) virus and increasing concentration of pcDNA HA-ZAP-L  
530 control (WT CTRL, dashed line), missing PARP domain or carrying amino acid  
531 substitutions in alternate triad motif (Y786H/Y818A/V875E, Y786A/Y818/V875A), or  
532 residues under positive selection (Y793A/S804A/F805A) (solid lines). (E)  
533 Corresponding AUC values. Mean of n=3 +/- SD. \* p < 0.05; \*\* p < 0.01; \*\*\* p < 0.001.

534 **Figure 3. Contribution of CaaX motif to ZAP's antiviral activity.** (A) Schematic  
535 showing ZAP-L, which contains PARP domain and CaaX motif (amino acids "CVIS")  
536 and short isoform of ZAP (ZAP-S). (B) Infectious virus yield from HEK293T ZAP KO  
537 co-transfected with WT (black) and mutant (red) virus and increasing concentration of  
538 ZAP-L CTRL (dashed line), ZAP-S, ZAP-L with mutated crucial cysteine (C899S) in  
539 CaaX or ZAP-S with added CVIS motif (solid lines). (C) Corresponding AUC values  
540 and representative western blot (250ng). (D) Infectious virus yield from HEK293T ZAP  
541 KO co-transfected with both viruses and pcDNA encoding truncated ZAP (1-256 or 1-  
542 352) with added CVIS motif and corresponding AUC values. Mean of n=3-5 +/- SD. \*  
543 p < 0.05; \*\* p < 0.01; \*\*\*\* p < 0.0001.

544 **Figure 4. Determinants of CpG-specific antiviral function in ZAP and PARP12.**  
545 (A) Schematic showing the domain organisation of ZAP-L and PARP12. (B) Schematic

546 of generated PARP12/ZAP chimeric constructs. (C) Infectious virus yield from  
547 HEK293T ZAP KO co-transfected with WT (black) and mutant (red) virus and  
548 increasing concentration of pcDNA HA-ZAP-L CTRL (dashed line), PARP12, or  
549 ZAP/PARP12 chimera (solid lines) and (D) corresponding AUC values and  
550 representative western blot (250ng). Mean of n=3+/- SD. \* p < 0.05

551 **Figure 5. Cellular distribution of ZAP-S, ZAP-L and their CaaX motif mutants.** (A)  
552 Confocal microscopy images of live HEK293T ZAP KO cells 24h after transfection with  
553 250ng of GFP-tagged ZAP isoforms or ZAP-L with inactivated CaaX (C899S) and  
554 ZAP-S with added CaaX motif (+CVIS). Size bar 10µm. (B) Representative western  
555 blot and quantification of ZAP present in cell fractionation samples of parental  
556 HEK293Ts (mean of n=5) or (C) ZAP KO cells following transfection of 60ng HA-ZAP  
557 constructs (mean of n=3). Cytoplasmic (C), membrane (M) and insoluble (I) fractions  
558 are shown. Calnexin serves as a marker for membrane protein and G3BP and GAPDH  
559 are cytoplasmic protein controls.

560 **Figure 6. Binding of ZAP to cofactors KHNYN and TRIM25.** Upper panel:  
561 Representative western blot of GFP-ZAP isoforms and mutants overexpressed in  
562 HEK293T ZAP KO cells and co-immunoprecipitated using GFP-binding magnetic  
563 beads. Input and pulldown samples were stained for GFP as well as endogenous  
564 KHNYN and TRIM25. Lower panel: quantification of pulled-down KHNYN and TRIM25  
565 normalized to relative GFP signal. Mean of n=5 + SD. \* p < 0.05; \*\* p < 0.01; \*\*\*  
566 p < 0.001; \*\*\*\* p < 0.001.

567 **Figure 7. Role of identified ZAP motifs in the inhibition of SARS-CoV-2.** (A) Viral  
568 RNA produced in HEK293T ZAP KO cells transfected with pcDNA encoding human  
569 ACE2 and indicated ZAP isoforms/ mutants or GFP control plasmid, 48h after infection  
570 with SARS-CoV-2 England 2 strain at 0.01 MOI. Quantification of qRT-PCR detecting



571 viral nucleocapsid (N) RNA in the cell supernatant and (B) SARS-CoV-2 N levels in  
572 the infected cells, with a representative western blot (lower panel). Mean of n=4 + SD.  
573 \* p < 0.05; \*\* p < 0.01; \*\*\* p < 0.001; \*\*\*\* p < 0.001.

## 574 **Supporting information**

### 575 **Figure S1. Effect of expressed ZAP mutants on viral protein levels.**

576 Representative western blots of experiment shown in (A) Fig.1B and (B) Fig.2D.

### 577 **Figure S2. Antiviral effect of ZAP-L and ZAP-S co-overexpression.**

578 Infectious virus yield from HEK293T ZAP KO cells co-transfected with wild type (WT; black) HIV-1 and  
579 CpG-enriched mutant (CpG-high; red) viruses and increasing doses of pcDNA HA-  
580 ZAP constructs encoding ZAP-L (dashed lines), ZAP-S or 1:1 ratio of both isoforms  
581 up to 250ng each (solid lines). Values were normalized to infectivity in the absence of  
582 ZAP for each virus (100%). Mean of n=5 +/- SD. Lower panel: representative western  
583 blot (250ng HA-ZAP).

### 584 **Figure S3. Alignment of RBD of ZAP and PARP12 and conservation of ZAP-L's**

585 **CVIS motif in mammals and birds.** (A) Alignment of RNA-binding domains of human  
586 ZAP and its paralogue PARP12. Four zinc fingers (grey boxes) and ZAP residues  
587 interacting with CpG dinucleotide in bound RNA (highlighted in pink) are indicated. (B)  
588 Logo plot of C-termini of mammalian and bird ZAP-L orthologues from NCBI database.  
589 Highly conserved C-terminal serine (S901) determines targeting by cellular farnesyl  
590 transferase which prenylates highly conserved cysteine (C899).

### 591 **Figure S4. CpG-specific antiviral activity of HA and GFP tagged ZAP isoforms.**

592 Infectious virus yield from HEK293T ZAP KO cells co-transfected with wild type (WT;  
593 black) HIV-1 and CpG-enriched mutant (CpG-high; red) viruses and increasing doses

594 of pcDNA ZAP with N-terminal hemagglutinin tag (HA) or monomeric enhanced green  
595 fluorescent protein (GFP) tag. Mean of n=3 +/- SD.

596 **Figure S5. Re-localization of ZAP isoforms and their CVIS mutants to stress-**  
597 **granules.** HeLa ZAP KO cells were transfected with 125ng GFP-ZAP (green) and  
598 stained for stress-granule marker G3BP (red) following treatment with 100ng of  
599 poly(I:C). DAPI staining shows cell nuclei (blue).

600 **Figure S6. Effect of 0.15M-1M NaCl washes on ZAP's membrane localization.**  
601 Western blot and protein quantification following fractionation of HEK293T cells.  
602 Cytoplasmic (C), membrane (M) and insoluble (I) fractions are shown, with relative  
603 levels of endogenous ZAP-L and ZAP-S, as well as controls calnexin (membrane  
604 fraction control), and G3BP, GAPDH and TRIM25 (cytoplasmic fraction controls).

605

606

607

608

609

610

611

612

613

614

615

616

617

618 **References**

- 619 1. S. F. Kluge, D. Sauter, & F. Kirchhoff, SnapShot: Antiviral Restriction Factors.  
620 *Cell*, **163** (2015) 774-774.e1. <https://doi.org/10.1016/j.cell.2015.10.019>.
- 621 2. K. D. Ryman, K. C. Meier, E. M. Nangle, S. L. Ragsdale, N. L. Korneeva, R. E.  
622 Rhoads, M. R. MacDonald, & W. B. Klimstra, Sindbis Virus Translation Is  
623 Inhibited by a PKR/RNase L-Independent Effector Induced by Alpha/Beta  
624 Interferon Priming of Dendritic Cells. *Journal of Virology*, **79** (2005) 1487–  
625 1499. <https://doi.org/10.1128/jvi.79.3.1487-1499.2005>.
- 626 3. J. A. Kerns, M. Emerman, & H. S. Malik, Positive selection and increased  
627 antiviral activity associated with the PARP-containing isoform of human zinc-  
628 finger antiviral protein. *PLoS Genetics*, **4** (2008) 0150–0158.  
629 <https://doi.org/10.1371/journal.pgen.0040021>.
- 630 4. T. Todorova, F. J. Bock, & P. Chang, PARP13 regulates cellular mRNA post-  
631 transcriptionally and functions as a pro-apoptotic factor by destabilizing  
632 TRAILR4 transcript. *Nature Communications*, **5** (2014) 5362.  
633 <https://doi.org/10.1038/ncomms6362>.
- 634 5. R. Nchioua, D. Kmiec, J. A. Müller, C. Conzelmann, R. Groß, C. M. Swanson,  
635 S. J. D. Neil, S. Stenger, D. Sauter, J. Münch, K. M. J. Sparrer, & F. Kirchhoff,  
636 Sars-cov-2 is restricted by zinc finger antiviral protein despite preadaptation to  
637 the low-cpg environment in humans. *mBio*, **11** (2020) 1–19.  
638 <https://doi.org/10.1128/mBio.01930-20>.

- 639 6. D. Ghimire, M. Rai, & R. Gaur, Novel host restriction factors implicated in HIV-  
640 1 replication. *Journal of General Virology*, **99** (2018) 435–446.  
641 <https://doi.org/10.1099/jgv.0.001026>.
- 642 7. G. Gao, X. Guo, & S. P. Goff, Inhibition of retroviral RNA production by ZAP, a  
643 CCCH-type zinc finger protein. *Science*, **297** (2002) 1703–1706.  
644 <https://doi.org/10.1126/science.1074276>.
- 645 8. Y. Zhu, G. Chen, F. Lv, X. Wang, X. Ji, Y. Xu, J. Sun, L. Wu, Y. T. Zheng, & G.  
646 Gao, Zinc-finger antiviral protein inhibits HIV-1 infection by selectively targeting  
647 multiply spliced viral mRNAs for degradation. *Proceedings of the National*  
648 *Academy of Sciences of the United States of America*, **108** (2011) 15834–  
649 15839. <https://doi.org/10.1073/pnas.1101676108>.
- 650 9. Y. Zhu, X. Wang, S. P. Goff, & G. Gao, Translational repression precedes and  
651 is required for ZAP-mediated mRNA decay. *EMBO Journal*, **31** (2012) 4236–  
652 4246. <https://doi.org/10.1038/emboj.2012.271>.
- 653 10. X. Guo, J.-W. N. Carroll, M. R. MacDonald, S. P. Goff, & G. Gao, The Zinc  
654 Finger Antiviral Protein Directly Binds to Specific Viral mRNAs through the  
655 CCCH Zinc Finger Motifs. *Journal of Virology*, **78** (2004) 12781–12787.  
656 <https://doi.org/10.1128/jvi.78.23.12781-12787.2004>.
- 657 11. X. Guo, J. Ma, J. Sun, & G. Gao, The zinc-finger antiviral protein recruits the  
658 RNA processing exosome to degrade the target mRNA. *Proceedings of the*  
659 *National Academy of Sciences of the United States of America*, **104** (2007)  
660 151–156. <https://doi.org/10.1073/pnas.0607063104>.
- 661 12. M. M. H. Li, Z. Lau, P. Cheung, E. G. Aguilar, W. M. Schneider, L. Bozzacco,  
662 H. Molina, E. Buehler, A. Takaoka, C. M. Rice, D. P. Felsenfeld, & M. R.

- 663 MacDonalD, TRIM25 Enhances the Antiviral Action of Zinc-Finger Antiviral  
664 Protein (ZAP). *PLoS Pathogens*, **13** (2017) e1006145.  
665 <https://doi.org/10.1371/journal.ppat.1006145>.
- 666 13. X. Zheng, X. Wang, F. Tu, Q. Wang, Z. Fan, & G. Gao, TRIM25 Is Required  
667 for the Antiviral Activity of Zinc Finger Antiviral Protein. *Journal of Virology*, **91**  
668 (2017). <https://doi.org/10.1128/jvi.00088-17>.
- 669 14. M. Ficarelli, H. Wilson, R. P. Galão, M. Mazzon, I. Antzin-Anduetza, M. Marsh,  
670 S. J. D. Neil, & C. M. Swanson, KHNYN is essential for the zinc finger antiviral  
671 protein (ZAP) to restrict HIV-1 containing clustered CpG dinucleotides. *eLife*, **8**  
672 (2019) e46767. <https://doi.org/10.7554/eLife.46767>.
- 673 15. V. Odon, J. J. Fros, N. Goonawardane, I. Dietrich, A. Ibrahim, K.  
674 Alshaikhahmed, D. Nguyen, & P. Simmonds, The role of ZAP and  
675 OAS3/RNaseL pathways in the attenuation of an RNA virus with elevated  
676 frequencies of CpG and UpA dinucleotides. *Nucleic Acids Research*, **47** (2019)  
677 8061–8083. <https://doi.org/10.1093/nar/gkz581>.
- 678 16. M. M. H. Li, E. G. Aguilar, E. Michailidis, J. Pabon, P. Park, X. Wu, Y. P. de  
679 Jong, W. M. Schneider, H. Molina, C. M. Rice, & M. R. MacDonald,  
680 Characterization of Novel Splice Variants of Zinc Finger Antiviral Protein  
681 (ZAP). *Journal of Virology*, **93** (2019). <https://doi.org/10.1128/jvi.00715-19>.
- 682 17. G. Xue, K. Braczyk, D. Gonçalves-Carneiro, D. M. Dawidziak, K. Zawada, H.  
683 Ong, Y. Wan, K. K. Zadrozny, B. K. Ganser-Pornillos, P. D. Bieniasz, & O.  
684 Pornillos, Poly(ADP-ribose) potentiates ZAP antiviral activity. *bioRxiv*, (2020)  
685 2020.12.17.423219. <https://doi.org/10.1101/2020.12.17.423219>.
- 686 18. M. A. Takata, D. Gonçalves-Carneiro, T. M. Zang, S. J. Soll, A. York, D.

- 687 Blanco-Melo, & P. D. Bieniasz, CG dinucleotide suppression enables antiviral  
688 defence targeting non-self RNA. *Nature*, **550** (2017) 124–127.  
689 <https://doi.org/10.1038/nature24039>.
- 690 19. J. L. Meagher, M. Takata, D. Gonçalves-Carneiro, S. C. Keane, A.  
691 Rebendenne, H. Ong, V. K. Orr, M. R. MacDonald, J. A. Stuckey, P. D.  
692 Bieniasz, & J. L. Smith, Structure of the zinc-finger antiviral protein in complex  
693 with RNA reveals a mechanism for selective targeting of CG-rich viral  
694 sequences. *Proceedings of the National Academy of Sciences of the United*  
695 *States of America*, **116** (2019) 24303–24309.  
696 <https://doi.org/10.1073/pnas.1913232116>.
- 697 20. X. Luo, X. Wang, Y. Gao, J. Zhu, S. Liu, G. Gao, & P. Gao, Molecular  
698 Mechanism of RNA Recognition by Zinc-Finger Antiviral Protein. *Cell Reports*,  
699 **30** (2020) 46-52.e4. <https://doi.org/10.1016/j.celrep.2019.11.116>.
- 700 21. J. cheng Shen, W. M. Rideout, & P. A. Jones, The rate of hydrolytic  
701 deamination of 5-methylcytosine in double-stranded DNA. *Nucleic Acids*  
702 *Research*, **22** (1994) 972–976. <https://doi.org/10.1093/nar/22.6.972>.
- 703 22. B. D. Greenbaum, A. J. Levine, G. Bhanot, & R. Rabadan, Patterns of  
704 evolution and host gene mimicry in influenza and other RNA viruses. *PLoS*  
705 *Pathogens*, **4** (2008) 1000079. <https://doi.org/10.1371/journal.ppat.1000079>.
- 706 23. I. Antzin-Anduetza, C. Mahiet, L. A. Granger, C. Odendall, & C. M. Swanson,  
707 Increasing the CpG dinucleotide abundance in the HIV-1 genomic RNA inhibits  
708 viral replication. *Retrovirology*, **14** (2017) 49. [https://doi.org/10.1186/s12977-](https://doi.org/10.1186/s12977-017-0374-1)  
709 [017-0374-1](https://doi.org/10.1186/s12977-017-0374-1).
- 710 24. M. Ficarelli, I. Antzin-Anduetza, R. Hugh-White, A. E. Firth, H. Sertkaya, H.

- 711 Wilson, S. J. D. Neil, R. Schulz, & C. M. Swanson, CpG Dinucleotides Inhibit  
712 HIV-1 Replication through Zinc Finger Antiviral Protein (ZAP)-Dependent and -  
713 Independent Mechanisms. *Journal of Virology*, **94** (2020).  
714 <https://doi.org/10.1128/jvi.01337-19>.
- 715 25. S. Karlin, W. Doerfler, & L. R. Cardon, Why is CpG suppressed in the  
716 genomes of virtually all small eukaryotic viruses but not in those of large  
717 eukaryotic viruses? *Journal of Virology*, **68** (1994) 2889–2897.  
718 <https://doi.org/10.1128/jvi.68.5.2889-2897.1994>.
- 719 26. X. Wang, F. Tu, Y. Zhu, & G. Gao, Zinc-Finger Antiviral Protein Inhibits XMRV  
720 Infection. *PLoS ONE*, **7** (2012) e39159.  
721 <https://doi.org/10.1371/journal.pone.0039159>.
- 722 27. P. Miyazato, M. Matsuo, B. J. Y. Tan, M. Tokunaga, H. Katsuya, S. Islam, J.  
723 Ito, Y. Murakawa, & Y. Satou, HTLV-1 contains a high CG dinucleotide content  
724 and is susceptible to the host antiviral protein ZAP. *Retrovirology*, **16** (2019) 1–  
725 11. <https://doi.org/10.1186/s12977-019-0500-3>.
- 726 28. D. Kmiec, R. Nchioua, S. Sherrill-Mix, C. M. Stürzel, E. Heusinger, E. Braun,  
727 M. V. P. Gondim, D. Hotter, K. M. J. Sparrer, B. H. Hahn, D. Sauter, & F.  
728 Kirchhoff, CpG frequency in the 5' third of the env gene determines sensitivity  
729 of primary HIV-1 strains to the zinc-finger antiviral protein. *mBio*, **11** (2020).  
730 <https://doi.org/10.1128/mBio.02903-19>.
- 731 29. D. Gonçalves-Carneiro, M. A. Takata, H. Ong, A. Shilton, & P. D. Bieniasz,  
732 Origin and evolution of the zinc finger antiviral protein. *PLOS Pathogens*, **17**  
733 (2021) e1009545. <https://doi.org/10.1371/journal.ppat.1009545>.
- 734 30. M. J. Bick, J.-W. N. Carroll, G. Gao, S. P. Goff, C. M. Rice, & M. R.

- 735 MacDonald, Expression of the Zinc-Finger Antiviral Protein Inhibits Alphavirus  
736 Replication. *Journal of Virology*, **77** (2003) 11555–11562.  
737 <https://doi.org/10.1128/jvi.77.21.11555-11562.2003>.
- 738 31. S. Chen, Y. Xu, K. Zhang, X. Wang, J. Sun, G. Gao, & Y. Liu, Structure of N-  
739 terminal domain of ZAP indicates how a zinc-finger protein recognizes  
740 complex RNA. *Nature Structural and Molecular Biology*, **19** (2012) 430–435.  
741 <https://doi.org/10.1038/nsmb.2243>.
- 742 32. L. M. J. Law, O. R. Albin, J.-W. N. Carroll, C. T. Jones, C. M. Rice, & M. R.  
743 MacDonald, Identification of a Dominant Negative Inhibitor of Human Zinc  
744 Finger Antiviral Protein Reveals a Functional Endogenous Pool and Critical  
745 Homotypic Interactions. *Journal of Virology*, **84** (2010) 4504–4512.  
746 <https://doi.org/10.1128/jvi.02018-09>.
- 747 33. S. Vyas, I. Matic, L. Uchima, J. Rood, R. Zaja, R. T. Hay, I. Ahel, & P. Chang,  
748 Family-wide analysis of poly(ADP-ribose) polymerase activity. *Nature*  
749 *Communications*, **5** (2014) 1–13. <https://doi.org/10.1038/ncomms5426>.
- 750 34. T. Karlberg, M. Klepsch, A. G. Thorsell, C. D. Andersson, A. Linusson, & H.  
751 Schüler, Structural basis for lack of ADP-ribosyltransferase activity in  
752 poly(ADP-ribose) polymerase-13/zinc finger antiviral protein. *Journal of*  
753 *Biological Chemistry*, **290** (2015) 7336–7344.  
754 <https://doi.org/10.1074/jbc.M114.630160>.
- 755 35. S. Gläsker, M. Töller, & B. M. Kümmerer, The alternate triad motif of the  
756 poly(ADP-ribose) polymerase-like domain of the human zinc finger antiviral  
757 protein is essential for its antiviral activity. *Journal of General Virology*, **95**  
758 (2014) 816–822. <https://doi.org/10.1099/vir.0.060988-0>.



- 759 36. M. M. H. Li, E. G. Aguilar, E. Michailidis, J. Pabon, P. Park, X. Wu, Y. P. de  
760 Jong, W. M. Schneider, H. Molina, C. M. Rice, & M. R. MacDonald,  
761 Characterization of Novel Splice Variants of Zinc Finger Antiviral Protein  
762 (ZAP). *Journal of Virology*, **93** (2019). <https://doi.org/10.1128/jvi.00715-19>.
- 763 37. J. Schwerk, F. W. Soveg, A. P. Ryan, K. R. Thomas, L. D. Hatfield, S. Ozarkar,  
764 A. Forero, A. M. Kell, J. A. Roby, L. So, J. L. Hyde, M. Gale, M. D. Daugherty,  
765 & R. Savan, RNA-binding protein isoforms ZAP-S and ZAP-L have distinct  
766 antiviral and immune resolution functions. *Nature Immunology*, **20** (2019)  
767 1610–1620. <https://doi.org/10.1038/s41590-019-0527-6>.
- 768 38. C. Peng, L. S. Wyatt, S. G. Glushakow-Smith, M. Lal-Nag, A. S. Weisberg, &  
769 B. Moss, Zinc-finger antiviral protein (ZAP) is a restriction factor for replication  
770 of modified vaccinia virus Ankara (MVA) in human cells. *PLoS Pathogens*, **16**  
771 (2020) e1008845. <https://doi.org/10.1371/journal.ppat.1008845>.
- 772 39. C. H. Liu, L. Zhou, G. Chen, & R. M. Krug, Battle between influenza A virus  
773 and a newly identified antiviral activity of the PARP-containing ZAPL protein.  
774 *Proceedings of the National Academy of Sciences of the United States of*  
775 *America*, **112** (2015) 14048–14053. <https://doi.org/10.1073/pnas.1509745112>.
- 776 40. J. L. Goodier, G. C. Pereira, L. E. Cheung, R. J. Rose, & H. H. Kazazian, The  
777 Broad-Spectrum Antiviral Protein ZAP Restricts Human Retrotransposition.  
778 *PLoS Genetics*, **11** (2015) e1005252.  
779 <https://doi.org/10.1371/journal.pgen.1005252>.
- 780 41. G. Charron, M. M. H. Li, M. R. MacDonald, & H. C. Hang, Prenylome profiling  
781 reveals S-farnesylation is crucial for membrane targeting and antiviral activity  
782 of ZAP long-isoform. *Proceedings of the National Academy of Sciences of the*

- 783 *United States of America*, **110** (2013) 11085–11090.  
784 <https://doi.org/10.1073/pnas.1302564110>.
- 785 42. E. I. Frolova, R. Gorchakov, L. Pereboeva, S. Atasheva, & I. Frolov, Functional  
786 Sindbis Virus Replicative Complexes Are Formed at the Plasma Membrane.  
787 *Journal of Virology*, **84** (2010) 11679–11695. [https://doi.org/10.1128/jvi.01441-](https://doi.org/10.1128/jvi.01441-10)  
788 10.
- 789 43. G. Wolff, R. W. A. L. Limpens, J. C. Zevenhoven-Dobbe, U. Laugks, S. Zheng,  
790 A. W. M. de Jong, R. I. Koning, D. A. Agard, K. Grünewald, A. J. Koster, E. J.  
791 Snijder, & M. Bárcena, A molecular pore spans the double membrane of the  
792 coronavirus replication organelle. *Science*, **369** (2020) 1395–1398.  
793 <https://doi.org/10.1126/SCIENCE.ABD3629>.
- 794 44. A. C. Gonzalez-Perez, M. Stempel, E. Wyler, C. Urban, A. Piras, T. Hennig, S.  
795 Ganskih, Y. Wei, A. Heim, M. Landthaler, A. Pichlmair, L. Dölken, M.  
796 Munschauer, F. Erhard, & M. M. Brinkmann, The zinc finger antiviral protein  
797 zap restricts human cytomegalovirus and selectively binds and destabilizes  
798 viral ul4/ul5 transcripts. *mBio*, **12** (2021). [https://doi.org/10.1128/mBio.02683-](https://doi.org/10.1128/mBio.02683-20)  
799 20.
- 800 45. B. Zhang, M. U. Goraya, N. Chen, L. Xu, Y. Hong, M. Zhu, & J. L. Chen, Zinc  
801 Finger CCCH-Type Antiviral Protein 1 Restricts the Viral Replication by  
802 Positively Regulating Type I Interferon Response. *Frontiers in Microbiology*, **11**  
803 (2020) 1912. <https://doi.org/10.3389/fmicb.2020.01912>.
- 804 46. A. K. L. Leung, S. Vyas, J. E. Rood, A. Bhutkar, P. A. Sharp, & P. Chang,  
805 Poly(ADP-Ribose) Regulates Stress Responses and MicroRNA Activity in the  
806 Cytoplasm. *Molecular Cell*, **42** (2011) 489–499.

- 807 <https://doi.org/10.1016/j.molcel.2011.04.015>.
- 808 47. G. J. Seo, R. P. Kincaid, T. Phanaksri, J. M. Burke, J. M. Pare, J. E. Cox, T. Y.  
809 Hsiang, R. M. Krug, & C. S. Sullivan, Reciprocal inhibition between intracellular  
810 antiviral signaling and the RNAi machinery in mammalian cells. *Cell Host and*  
811 *Microbe*, **14** (2013) 435–445. <https://doi.org/10.1016/j.chom.2013.09.002>.
- 812 48. M. M. Zimmer, A. Kibe, U. Rand, L. Pekarek, L. Cicin-Sain, & N. Caliskan,  
813 Revealing the host antiviral protein ZAP-S as an inhibitor of SARS-CoV-2  
814 programmed ribosomal frameshifting. *bioRxiv*, (2021) 2021.05.31.445667.  
815 <https://doi.org/10.1101/2021.05.31.445667>.
- 816 49. H. Hofemeister, K. Weber, & R. Stick, Association of prenylated proteins with  
817 the plasma membrane and the inner nuclear membrane is mediated by the  
818 same membrane-targeting motifs. *Molecular Biology of the Cell*, **11** (2000)  
819 3233–3246. <https://doi.org/10.1091/mbc.11.9.3233>.
- 820 50. D. Michaelson, W. Ali, V. K. Chiu, M. Bergo, J. Silletti, L. Wright, S. G. Young,  
821 & M. Philips, Postprenylation CAAX processing is required for proper  
822 localization of ras but not Rho GTPases. *Molecular Biology of the Cell*, **16**  
823 (2005) 1606–1616. <https://doi.org/10.1091/mbc.E04-11-0960>.
- 824 51. C. D. Go, J. D. R. Knight, A. Rajasekharan, B. Rathod, G. G. Hesketh, K. T.  
825 Abe, J.-Y. Youn, P. Samavarchi-Tehrani, H. Zhang, L. Y. Zhu, E. Popiel, J.-P.  
826 Lambert, É. Coyaud, S. W. T. Cheung, D. Rajendran, C. J. Wong, H.  
827 Antonicka, L. Pelletier, A. F. Palazzo, E. A. Shoubridge, B. Raught, & A.-C.  
828 Gingras, A proximity-dependent biotinylation map of a human cell. *Nature*,  
829 (2021) 1–5. <https://doi.org/10.1038/s41586-021-03592-2>.
- 830 52. E. Braun, D. Hotter, L. Koepke, F. Zech, R. Groß, K. M. J. Sparrer, J. A.

- 831 Müller, C. K. Pfaller, E. Heusinger, R. Wombacher, K. Sutter, U. Dittmer, M.  
832 Winkler, G. Simmons, M. R. Jakobsen, K. K. Conzelmann, S. Pöhlmann, J.  
833 Münch, O. T. Fackler, F. Kirchhoff, & D. Sauter, Guanylate-Binding Proteins 2  
834 and 5 Exert Broad Antiviral Activity by Inhibiting Furin-Mediated Processing of  
835 Viral Envelope Proteins. *Cell Reports*, **27** (2019) 2092-2104.e10.  
836 <https://doi.org/10.1016/j.celrep.2019.04.063>.
- 837 53. C. Krapp, D. Hotter, A. Gawanbacht, P. J. McLaren, S. F. Kluge, C. M. Stürzel,  
838 K. Mack, E. Reith, S. Engelhart, A. Ciuffi, V. Hornung, D. Sauter, A. Telenti, &  
839 F. Kirchhoff, Guanylate Binding Protein (GBP) 5 Is an Interferon-Inducible  
840 Inhibitor of HIV-1 Infectivity. *Cell Host and Microbe*, **19** (2016) 504–514.  
841 <https://doi.org/10.1016/j.chom.2016.02.019>.
- 842 54. F. W. Soveg, J. Schwerk, N. S. Gokhale, K. Cerosaletti, J. R. Smith, E. Pairo-  
843 Castineira, A. M. Kell, A. Forero, S. A. Zaver, K. Esser-Nobis, J. A. Roby, T.-Y.  
844 Hsiang, S. Ozarkar, J. M. Clingan, E. T. McAnarney, A. E. L Stone, U.  
845 Malhotra, J. Perez, C. Balu, E. J. Allenspach, J. L. Hyde, V. D. Menachery, S.  
846 N. Sarkar, J. J. Woodward, D. B. Stetson, J. Kenneth Baillie, J. H. Buckner, M.  
847 Gale Jr, & R. Savan, Endomembrane targeting of human OAS1 p46 augments  
848 antiviral activity. *bioRxiv*, (2021) 2021.04.21.440697.  
849 <https://doi.org/10.1101/2021.04.21.440697>.
- 850 55. A. Wickenhagen, E. Sugrue, S. Lytras, S. Kuchi, M. L. Turnbull, C. Loney, V.  
851 Herder, J. Allan, I. Jarmson, N. Cameron-Ruiz, M. Varjak, R. M. Pinto, D. G.  
852 Stewart, S. Swingler, M. Noerenberg, E. J. D. Greenwood, T. W. M. Crozier,  
853 Q. Gu, S. Clohisey, B. Wang, F. Trindade, M. Costa, M. F. Santana, L. Carlos,  
854 L. Ferreira, J. L. Da, S. Filho, M. Marti, R. J. Stanton, E. C. Y. Wang, A.  
855 Castello-Palomares, A. Ho, K. Baillie, R. F. Jarrett, D. L. Robertson, M.

- 856 Palmarini, P. J. Lehner, S. J. Rihn, & S. J. Wilson, A Prenylated dsRNA  
857 Sensor Protects Against Severe COVID-19 and is Absent in Horseshoe Bats  
858 1. *medRxiv*, (2021) 2021.05.05.21256681.  
859 <https://doi.org/10.1101/2021.05.05.21256681>.
- 860 56. X. Tan, L. Sun, J. Chen, & Z. J. Chen, Detection of Microbial Infections  
861 Through Innate Immune Sensing of Nucleic Acids. *Annual Review of*  
862 *Microbiology*, **72** (2018) 447–478. [https://doi.org/10.1146/annurev-micro-](https://doi.org/10.1146/annurev-micro-102215-095605)  
863 [102215-095605](https://doi.org/10.1146/annurev-micro-102215-095605).
- 864 57. I. Carter-O’Connell, A. Vermehren-Schmaedick, H. Jin, R. K. Morgan, L. L.  
865 David, & M. S. Cohen, Combining Chemical Genetics with Proximity-  
866 Dependent Labeling Reveals Cellular Targets of Poly(ADP-ribose) Polymerase  
867 14 (PARP14). *ACS Chemical Biology*, **13** (2018) 2841–2848.  
868 <https://doi.org/10.1021/acscchembio.8b00567>.
- 869 58. K. M. Rodriguez, S. C. Buch-Larsen, I. T. Kirby, I. R. Siordia, D. Hutin, M.  
870 Rasmussen, D. M. Grant, L. L. David, J. Matthews, M. L. Nielsen, & M. S.  
871 Cohen, Chemical genetics and proteome-wide site mapping reveal cysteine  
872 MARYlation by PARP-7 on immune-relevant protein targets. *eLife*, **10** (2021)  
873 1–94. <https://doi.org/10.7554/eLife.60480>.
- 874 59. E. J. Platt, K. Wehrly, S. E. Kuhmann, B. Chesebro, & D. Kabat, Effects of  
875 CCR5 and CD4 Cell Surface Concentrations on Infections by  
876 Macrophagetropic Isolates of Human Immunodeficiency Virus Type 1. *Journal*  
877 *of Virology*, **72** (1998) 2855–2864. [https://doi.org/10.1128/jvi.72.4.2855-](https://doi.org/10.1128/jvi.72.4.2855-2864.1998)  
878 [2864.1998](https://doi.org/10.1128/jvi.72.4.2855-2864.1998).
- 879 60. C. A. Derdeyn, J. M. Decker, J. N. Sfakianos, X. Wu, W. A. O’Brien, L. Ratner,

- 880 J. C. Kappes, G. M. Shaw, & E. Hunter, Sensitivity of Human  
881 Immunodeficiency Virus Type 1 to the Fusion Inhibitor T-20 Is Modulated by  
882 Coreceptor Specificity Defined by the V3 Loop of gp120. *Journal of Virology*,  
883 **74** (2000) 8358–8367. <https://doi.org/10.1128/jvi.74.18.8358-8367.2000>.
- 884 61. J. Seow, C. Graham, B. Merrick, S. Acors, S. Pickering, K. J. A. Steel, O.  
885 Hemmings, A. O’Byrne, N. Kouphou, R. P. Galao, G. Betancor, H. D. Wilson,  
886 A. W. Signell, H. Winstone, C. Kerridge, I. Huettner, J. M. Jimenez-Guardeño,  
887 M. J. Lista, N. Temperton, L. B. Snell, K. Bisnauthsing, A. Moore, A. Green, L.  
888 Martinez, B. Stokes, J. Honey, A. Izquierdo-Barras, G. Arbane, A. Patel, M. K.  
889 I. Tan, L. O’Connell, G. O’Hara, E. MacMahon, S. Douthwaite, G. Nebbia, R.  
890 Batra, R. Martinez-Nunez, M. Shankar-Hari, J. D. Edgeworth, S. J. D. Neil, M.  
891 H. Malim, & K. J. Doores, Longitudinal observation and decline of neutralizing  
892 antibody responses in the three months following SARS-CoV-2 infection in  
893 humans. *Nature Microbiology*, **5** (2020) 1598–1607.  
894 <https://doi.org/10.1038/s41564-020-00813-8>.
- 895 62. H. Winstone, M. J. Lista, A. C. Reid, C. Bouton, S. Pickering, R. P. Galao, C.  
896 Kerridge, K. J. Doores, C. M. Swanson, & S. J. D. Neil, The Polybasic  
897 Cleavage Site in SARS-CoV-2 Spike Modulates Viral Sensitivity to Type I  
898 Interferon and IFITM2. *Journal of Virology*, **95** (2021).  
899 <https://doi.org/10.1128/jvi.02422-20>.
- 900 63. B. Chesebro, K. Wehrly, J. Nishio, & S. Perryman, Macrophage-tropic human  
901 immunodeficiency virus isolates from different patients exhibit unusual V3  
902 envelope sequence homogeneity in comparison with T-cell-tropic isolates:  
903 definition of critical amino acids involved in cell tropism. *Journal of Virology*, **66**  
904 (1992).



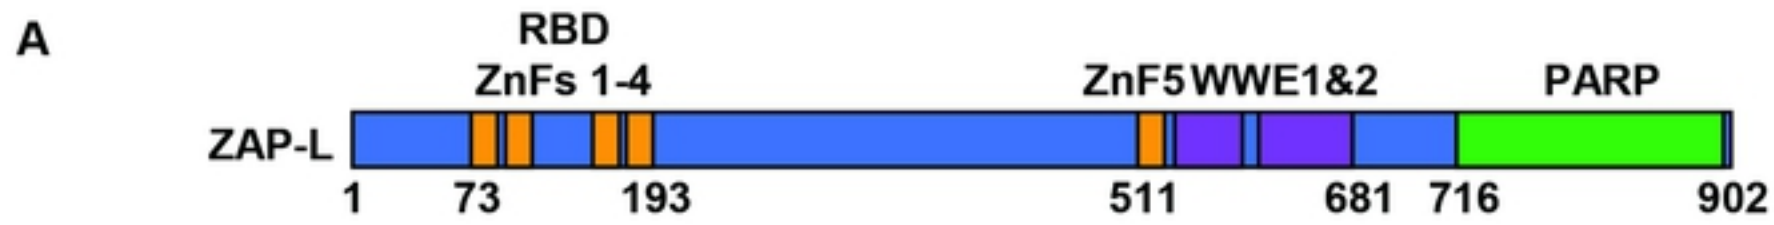

**B**

bioRxiv preprint doi: <https://doi.org/10.1101/2021.06.22.449398>; this version posted June 22, 2021. The copyright holder for this preprint (which was not certified by peer review) is the author/funder, who has granted bioRxiv a license to display the preprint in perpetuity. It is made available under aCC-BY 4.0 International license.

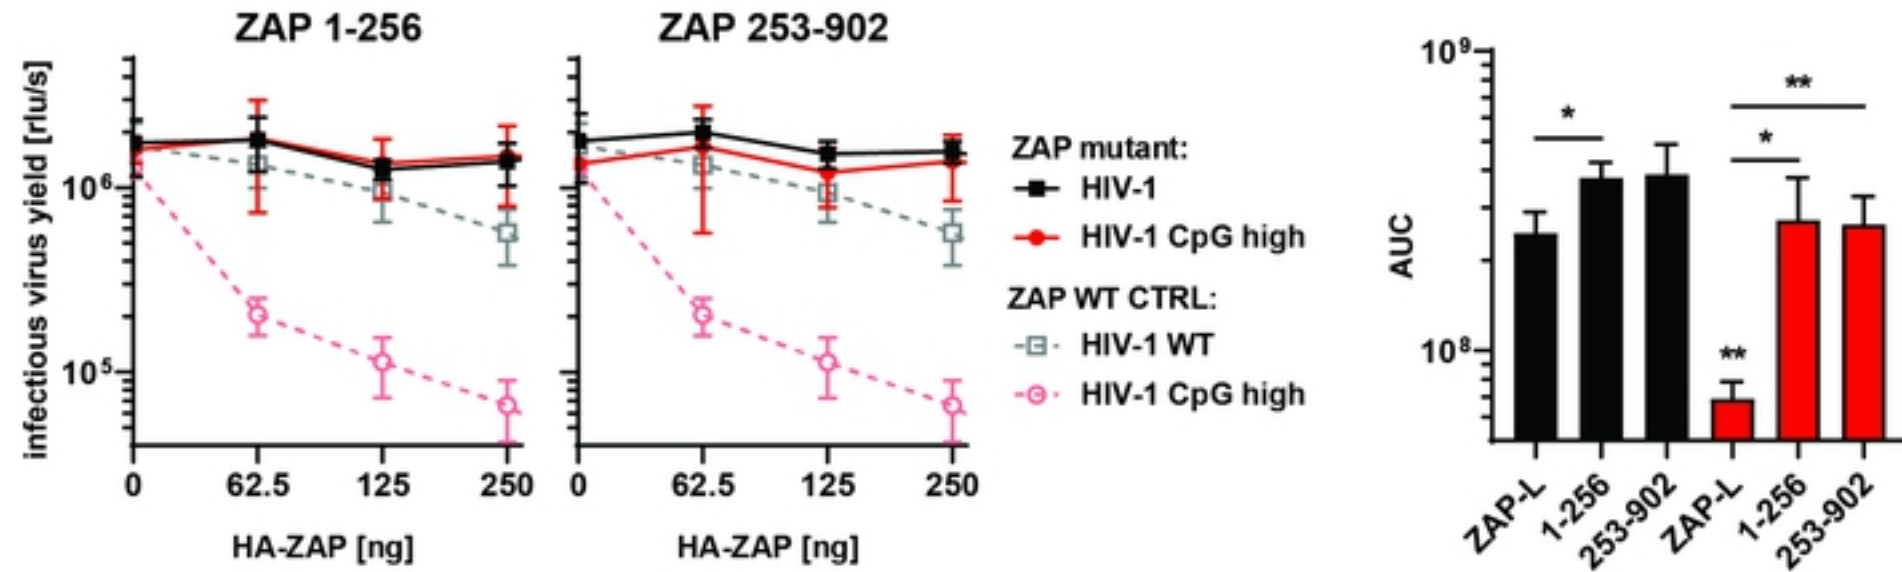

**C**

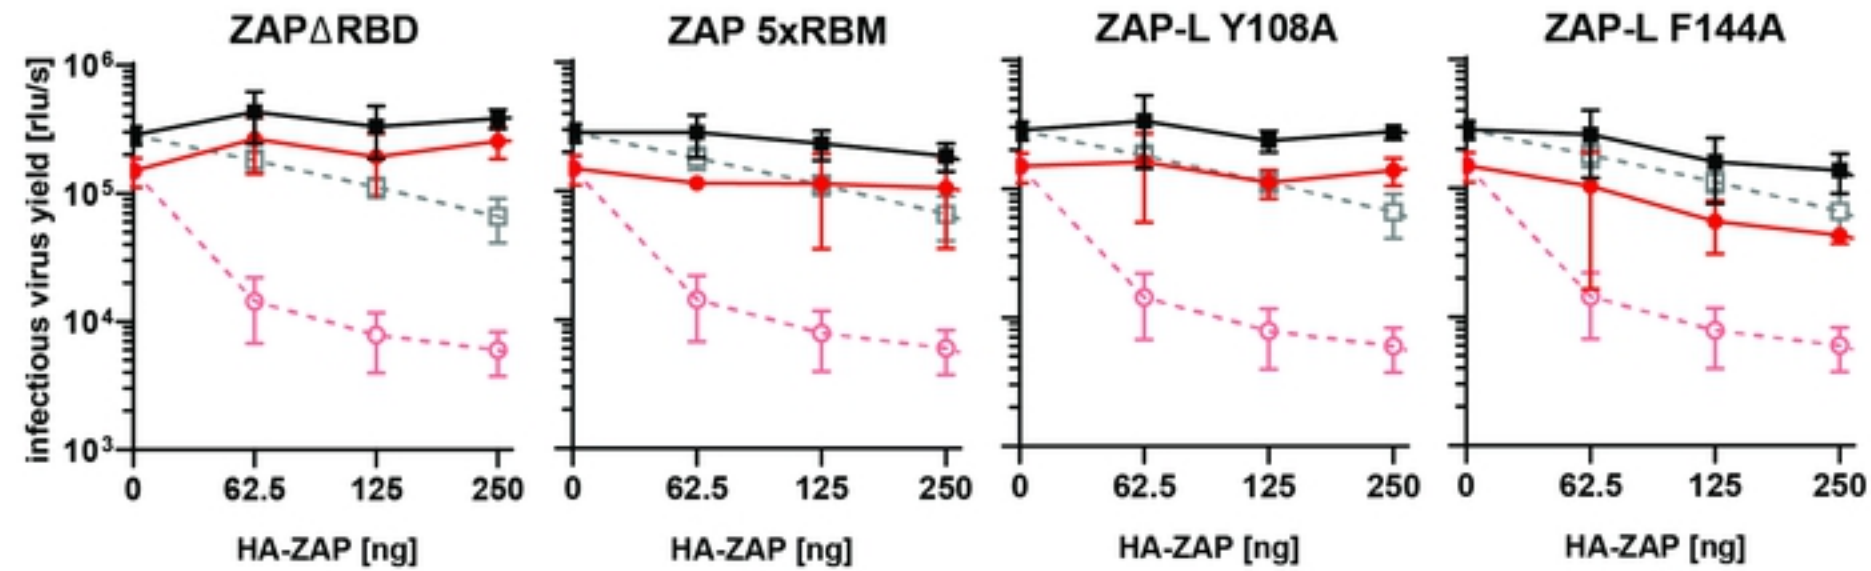

**D**

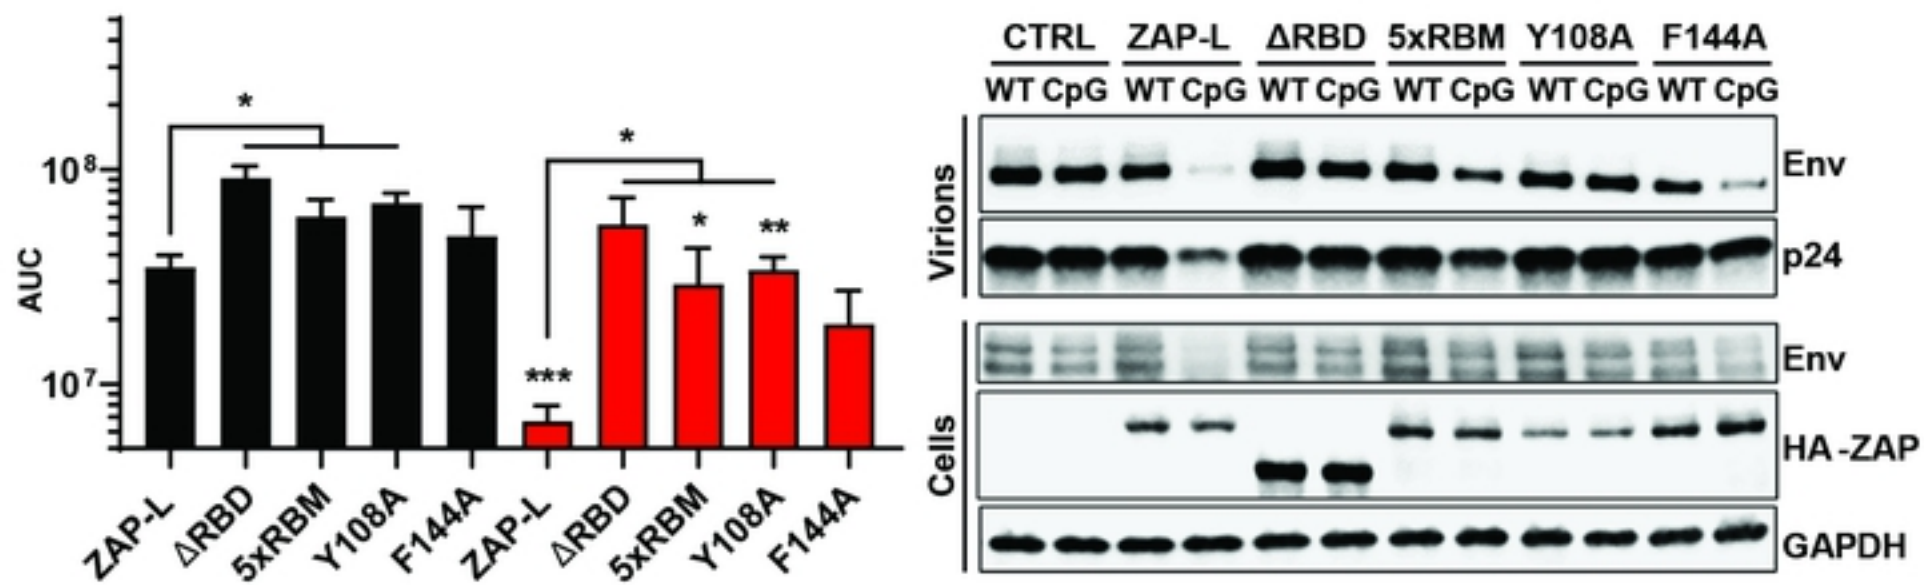



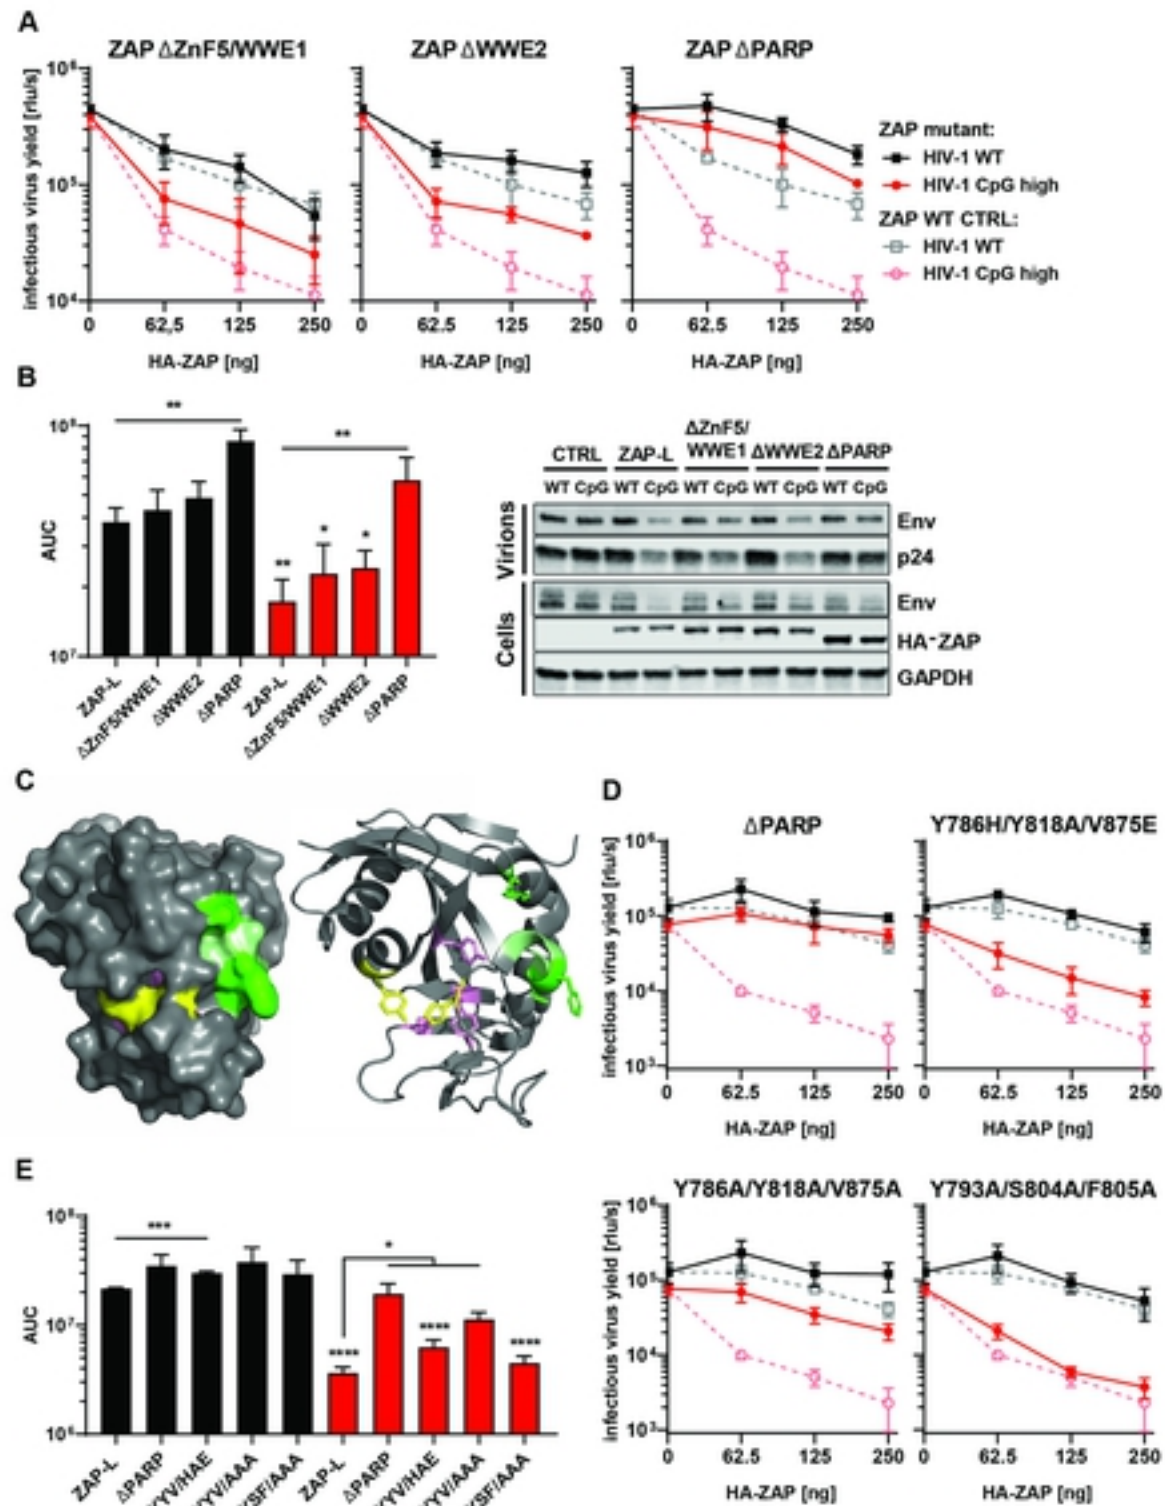

Fig 2

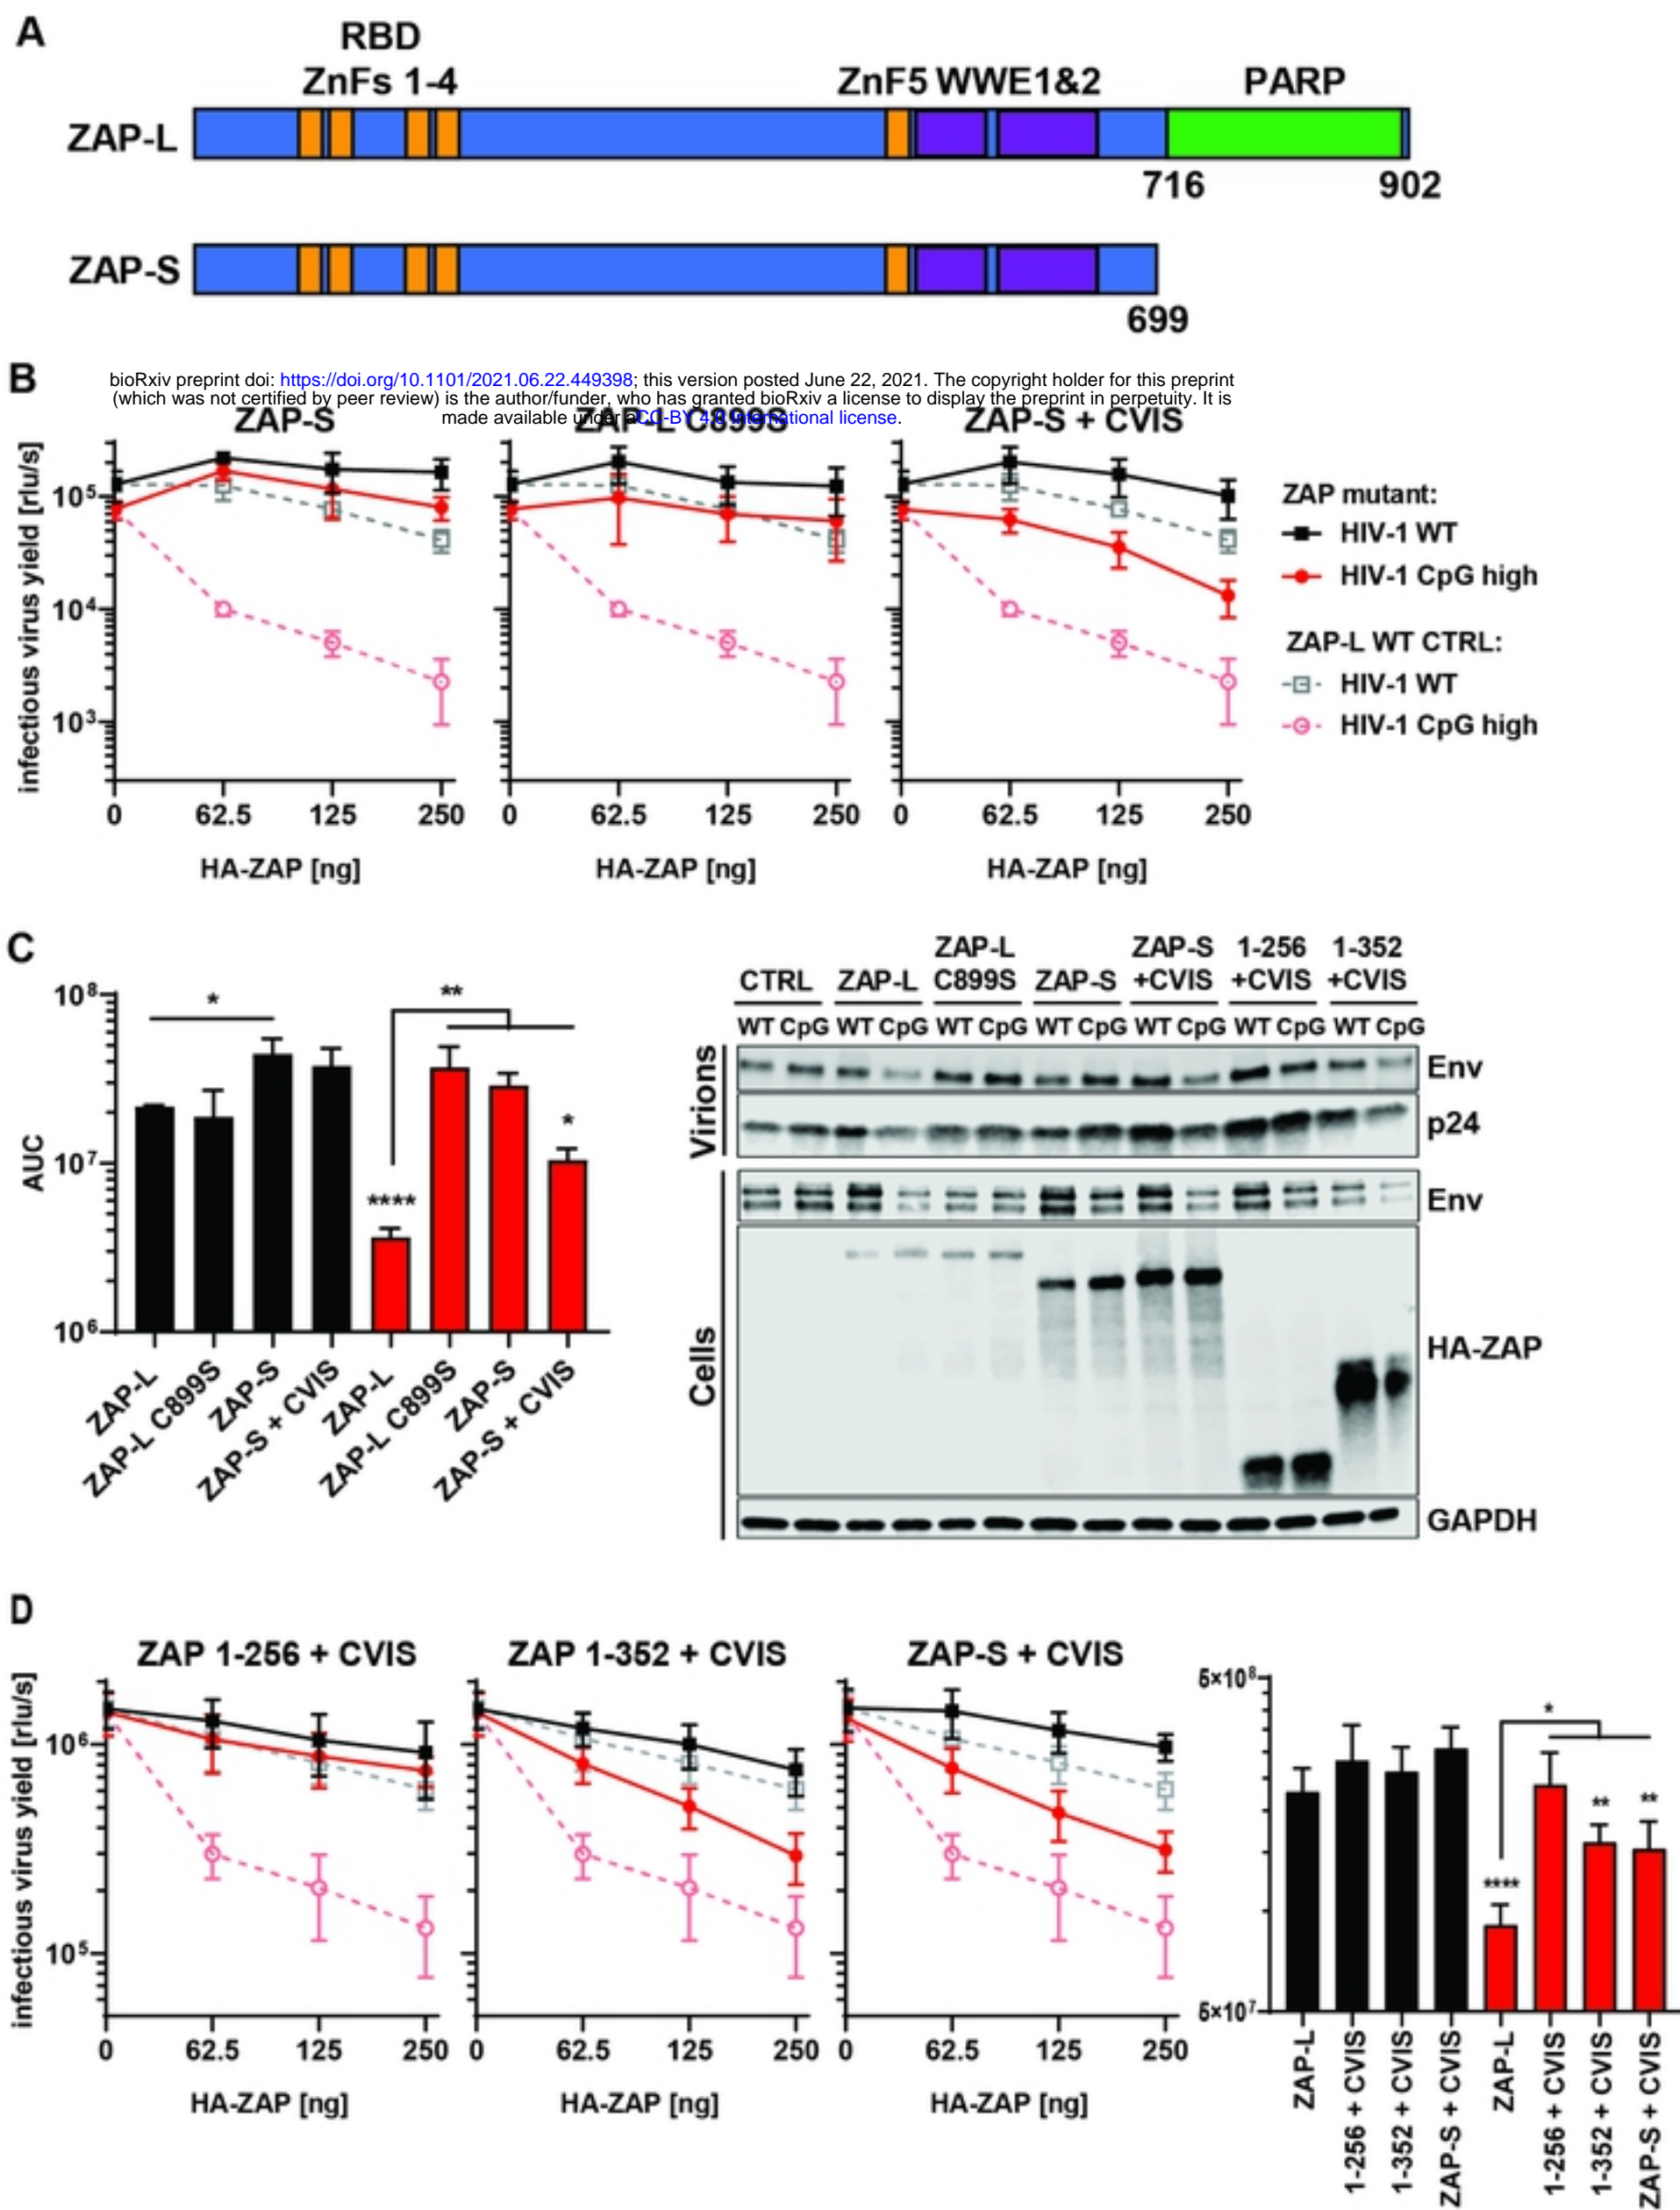

Fig 3

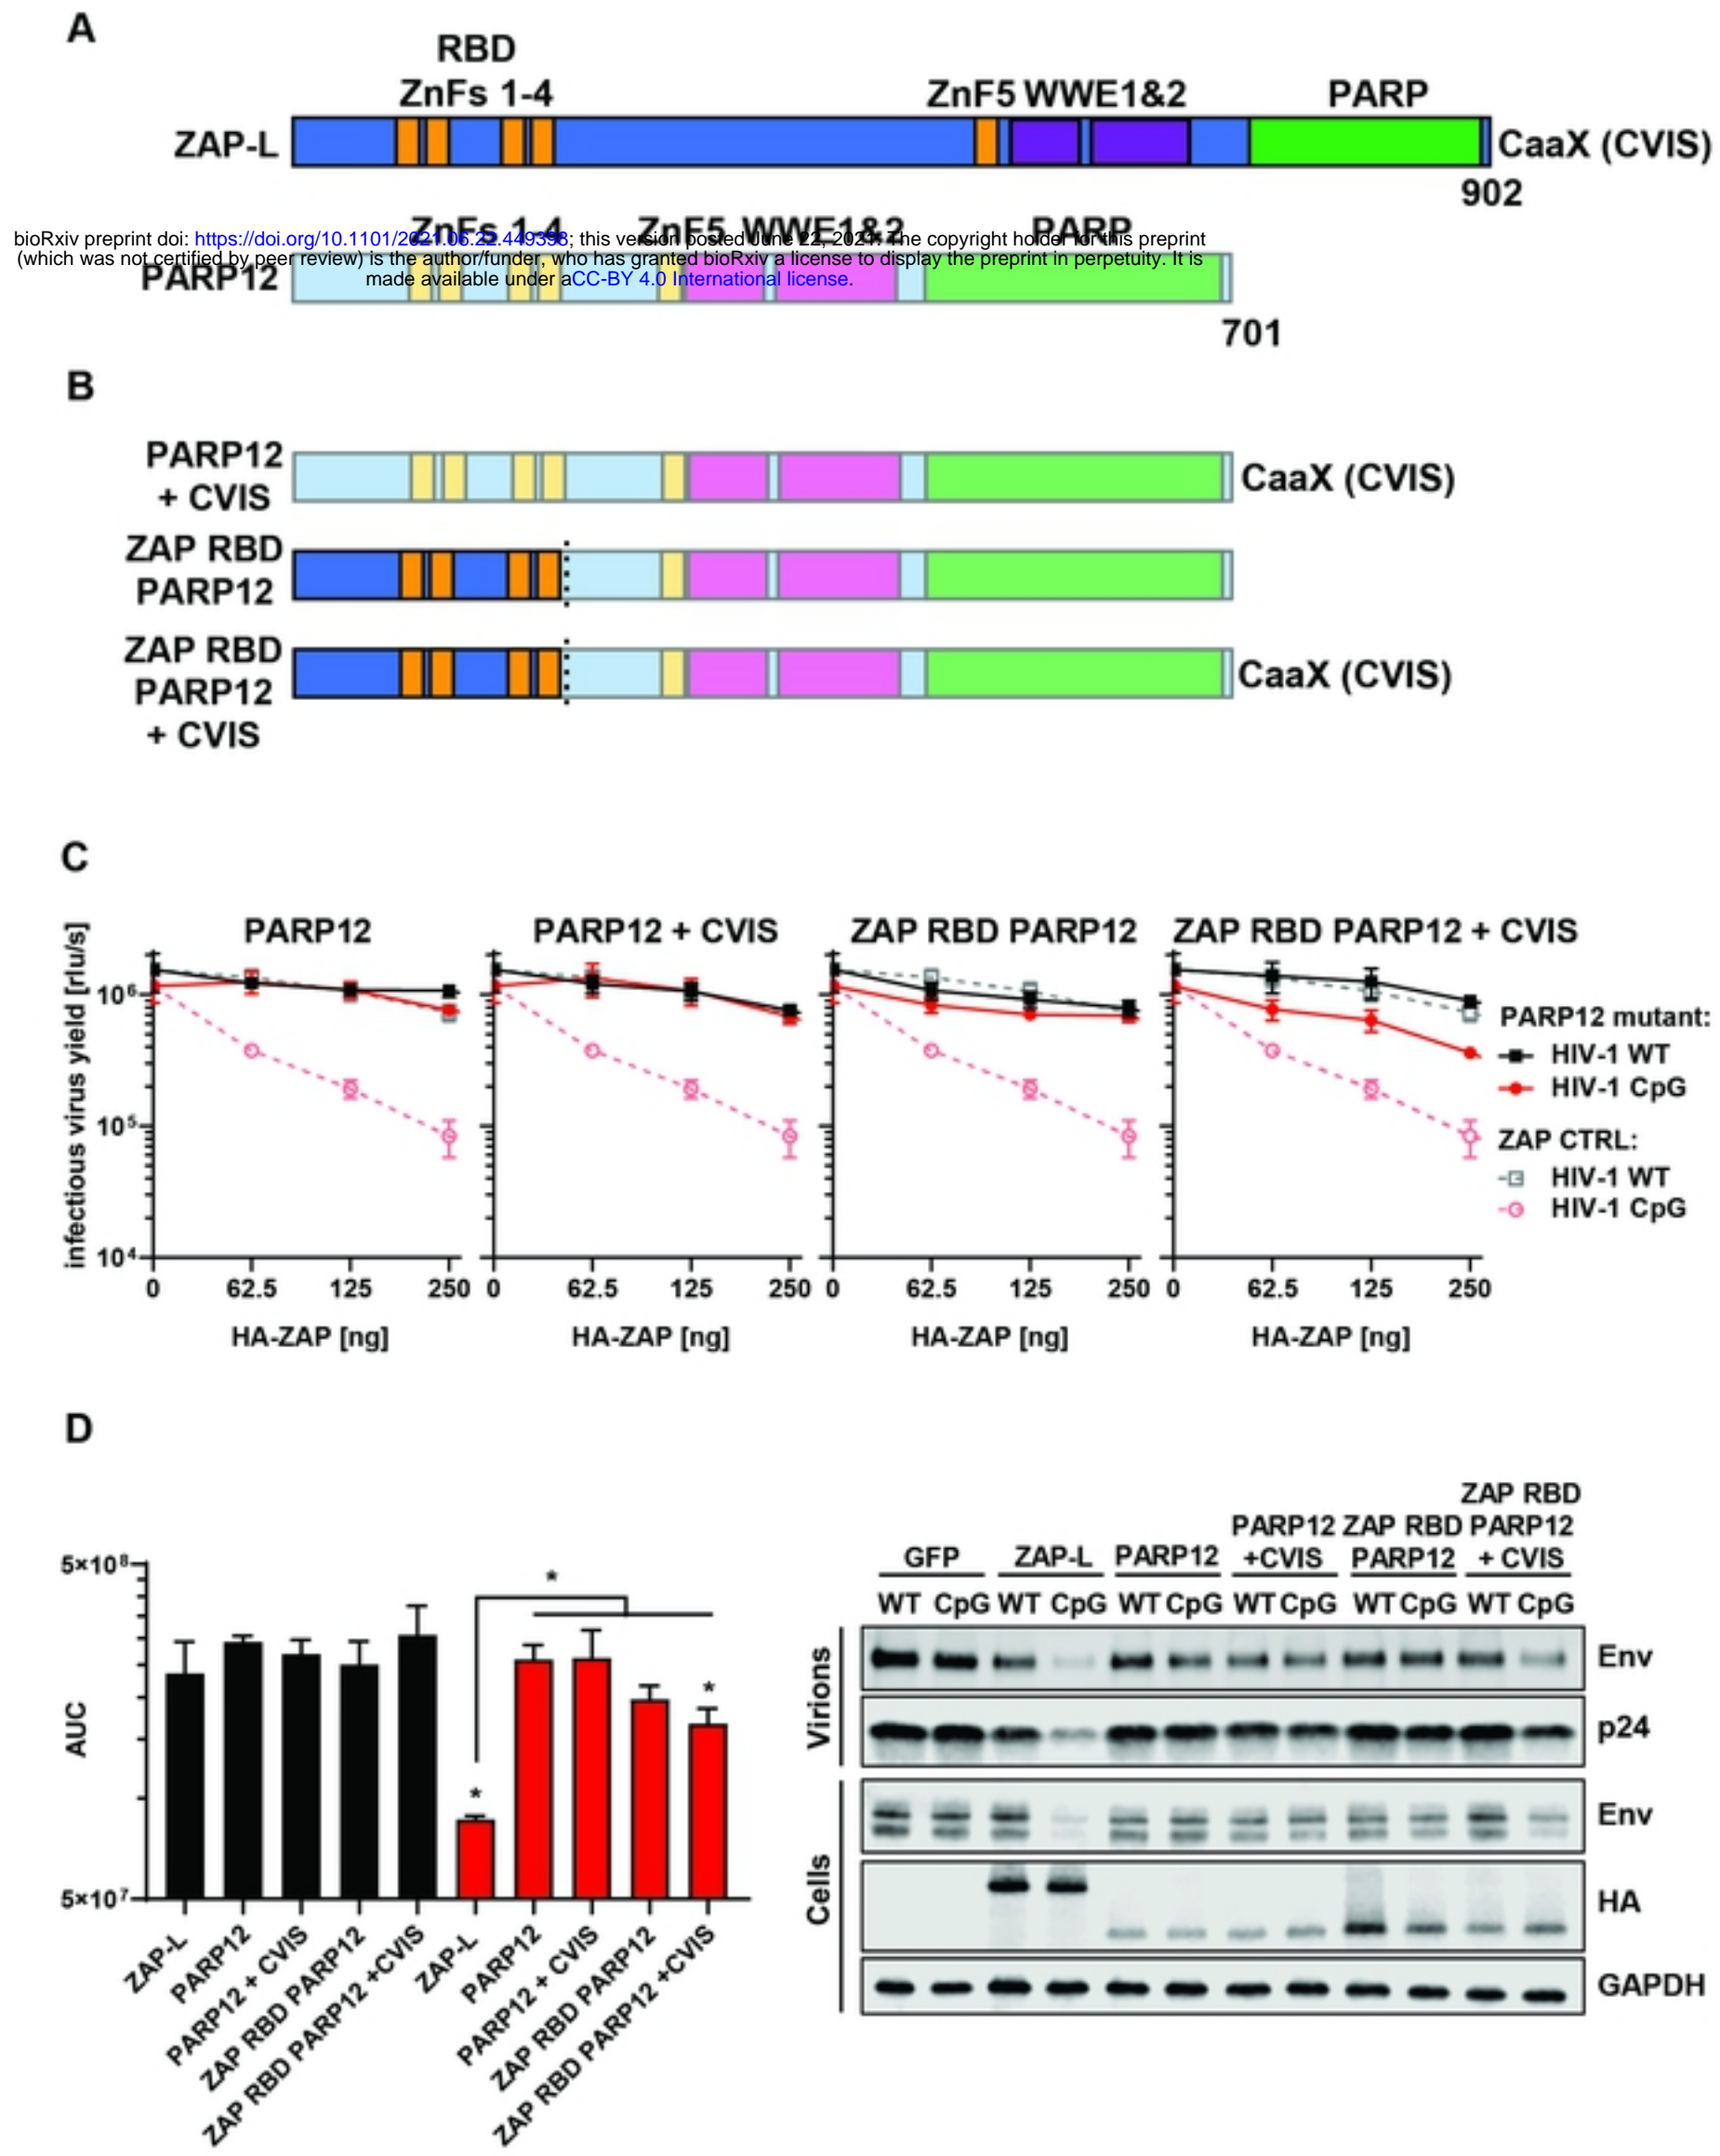

Fig 4

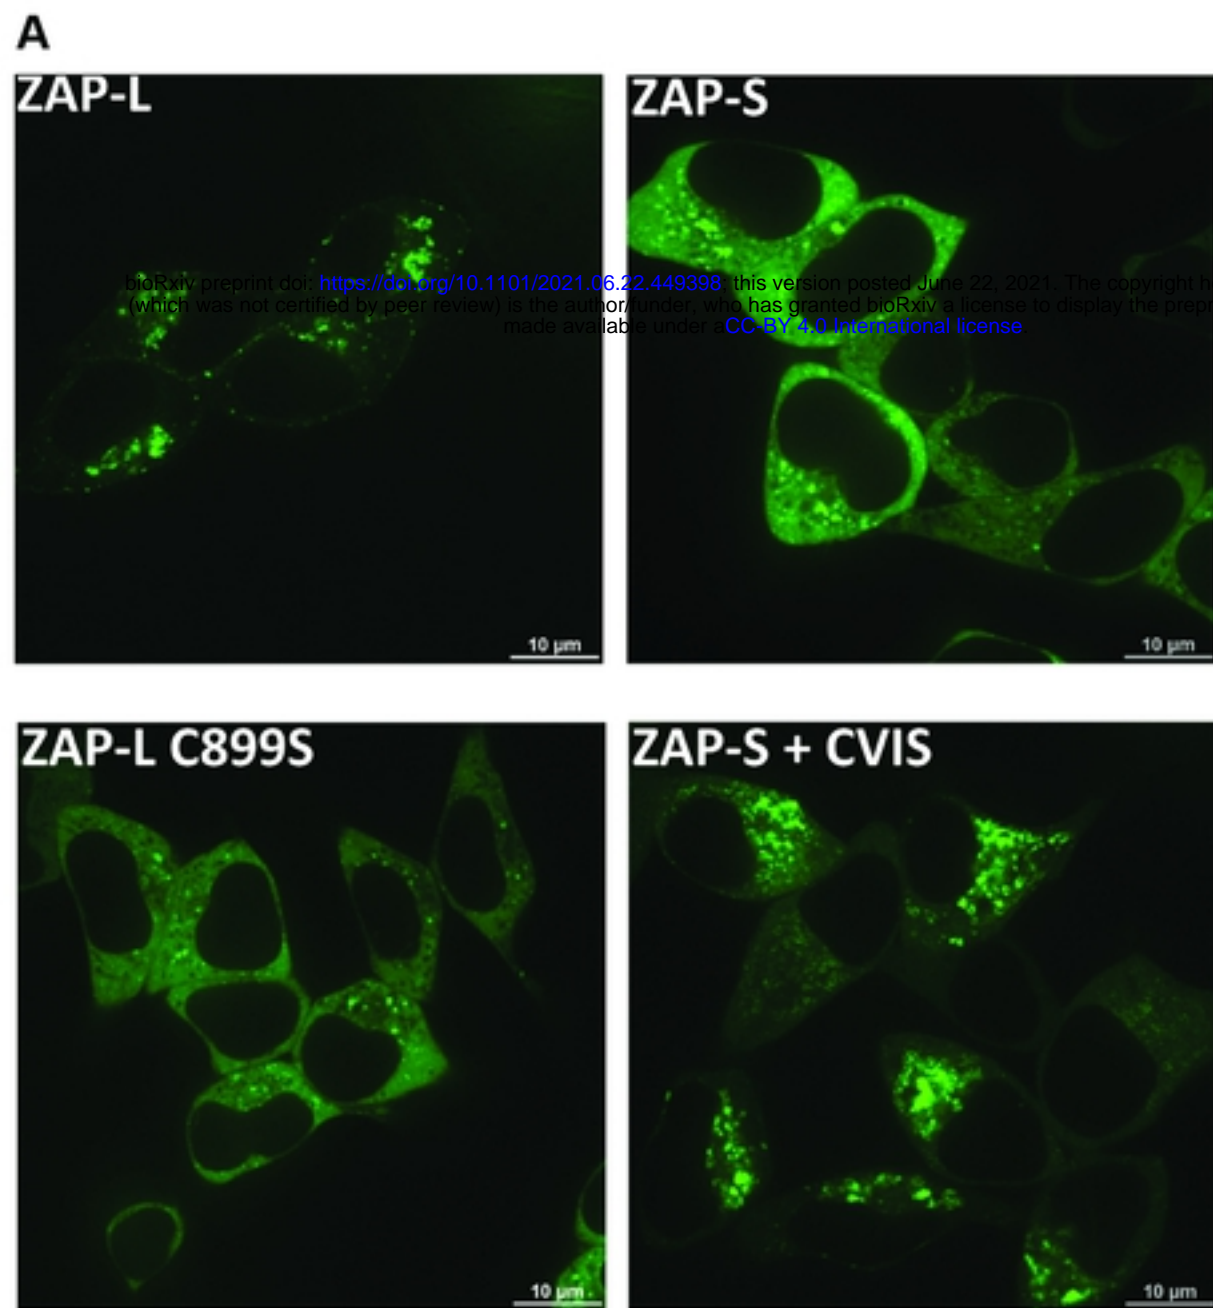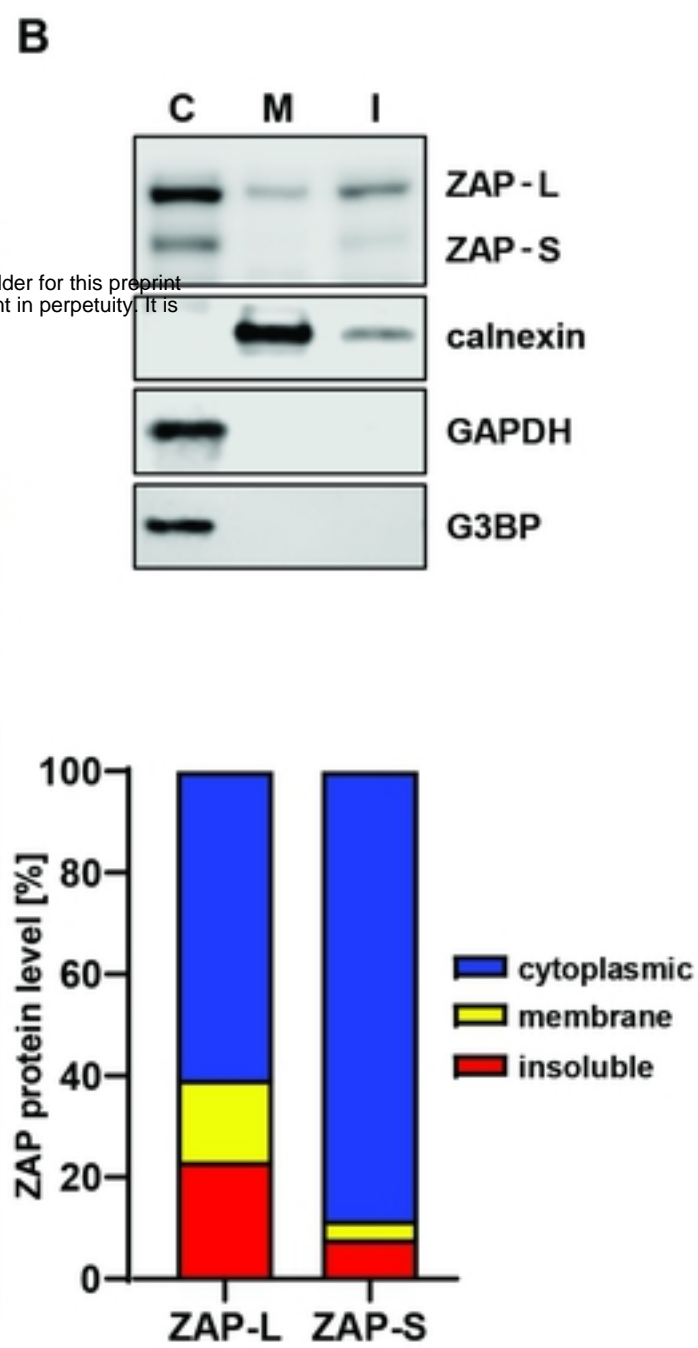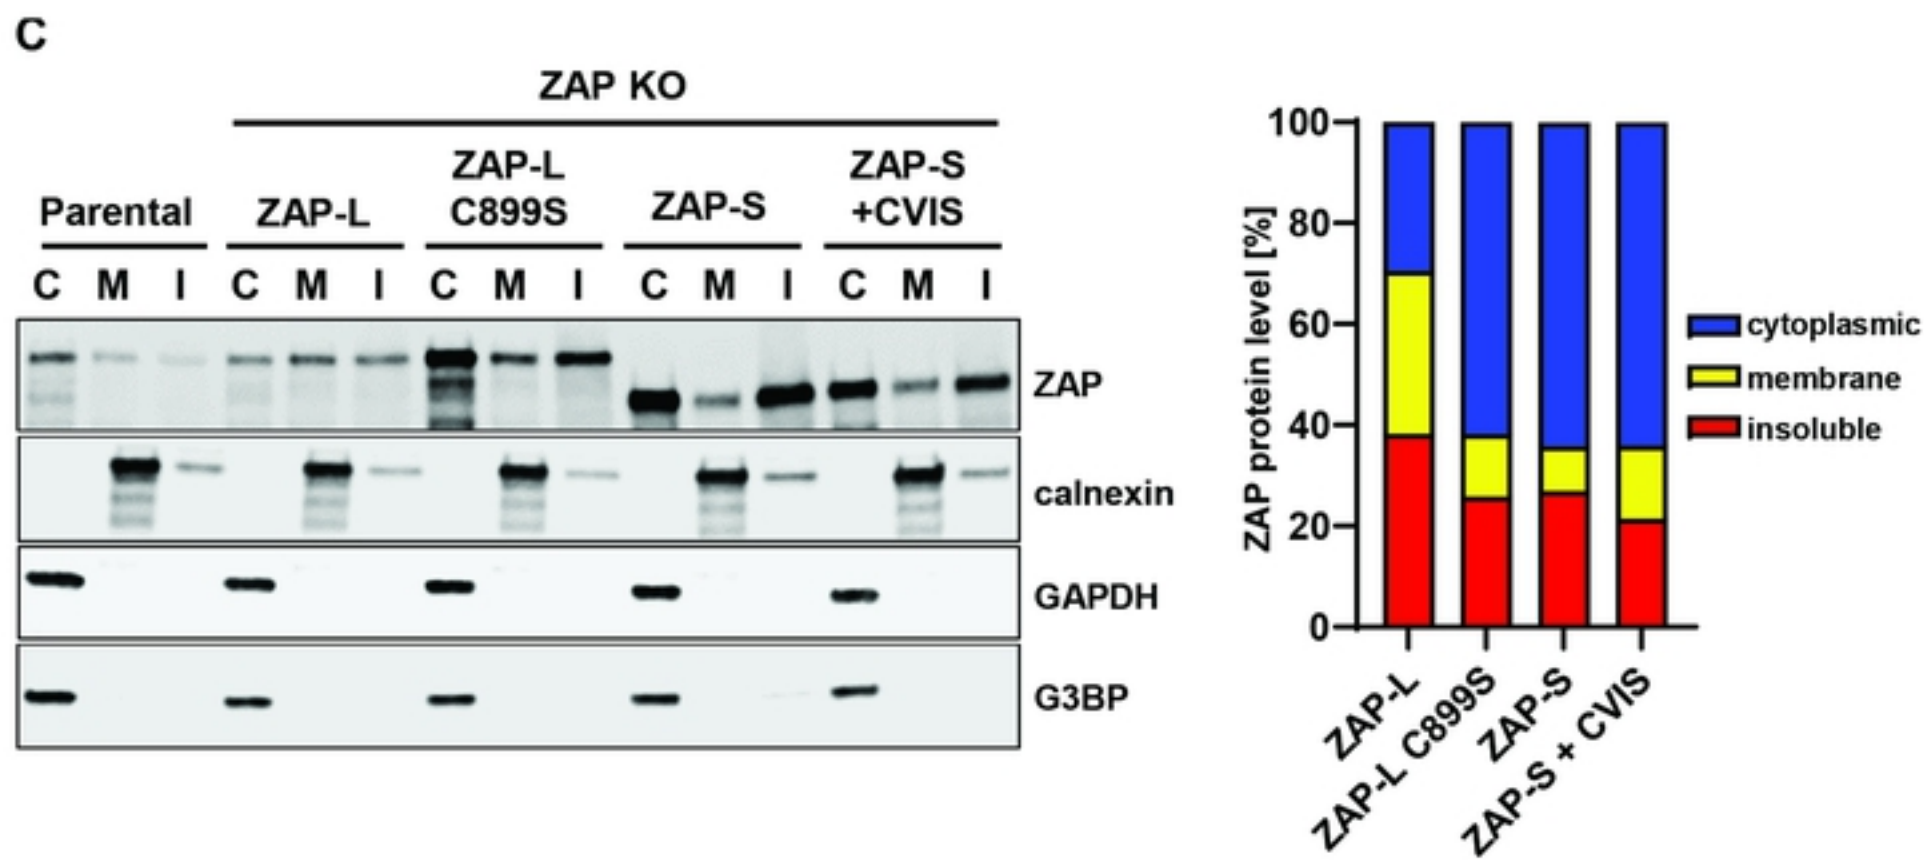

Fig 5

## INPUT

## PULLDOWN

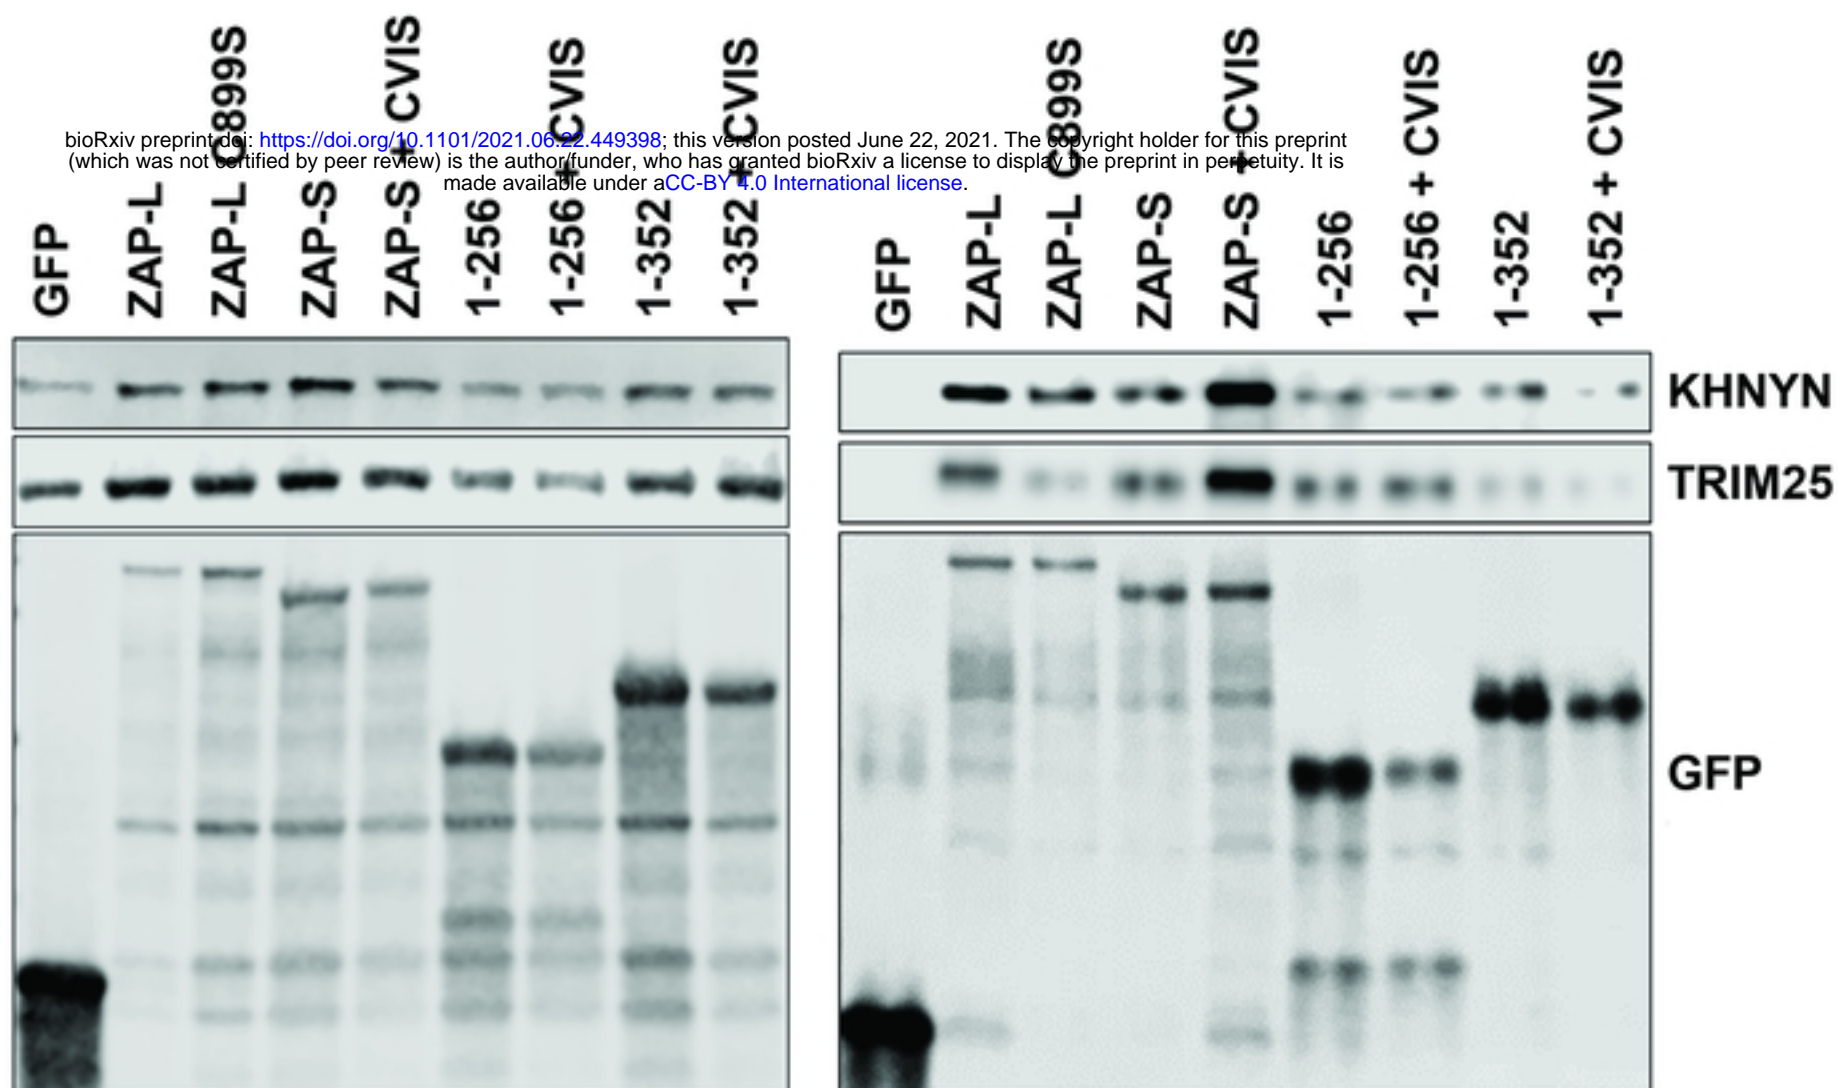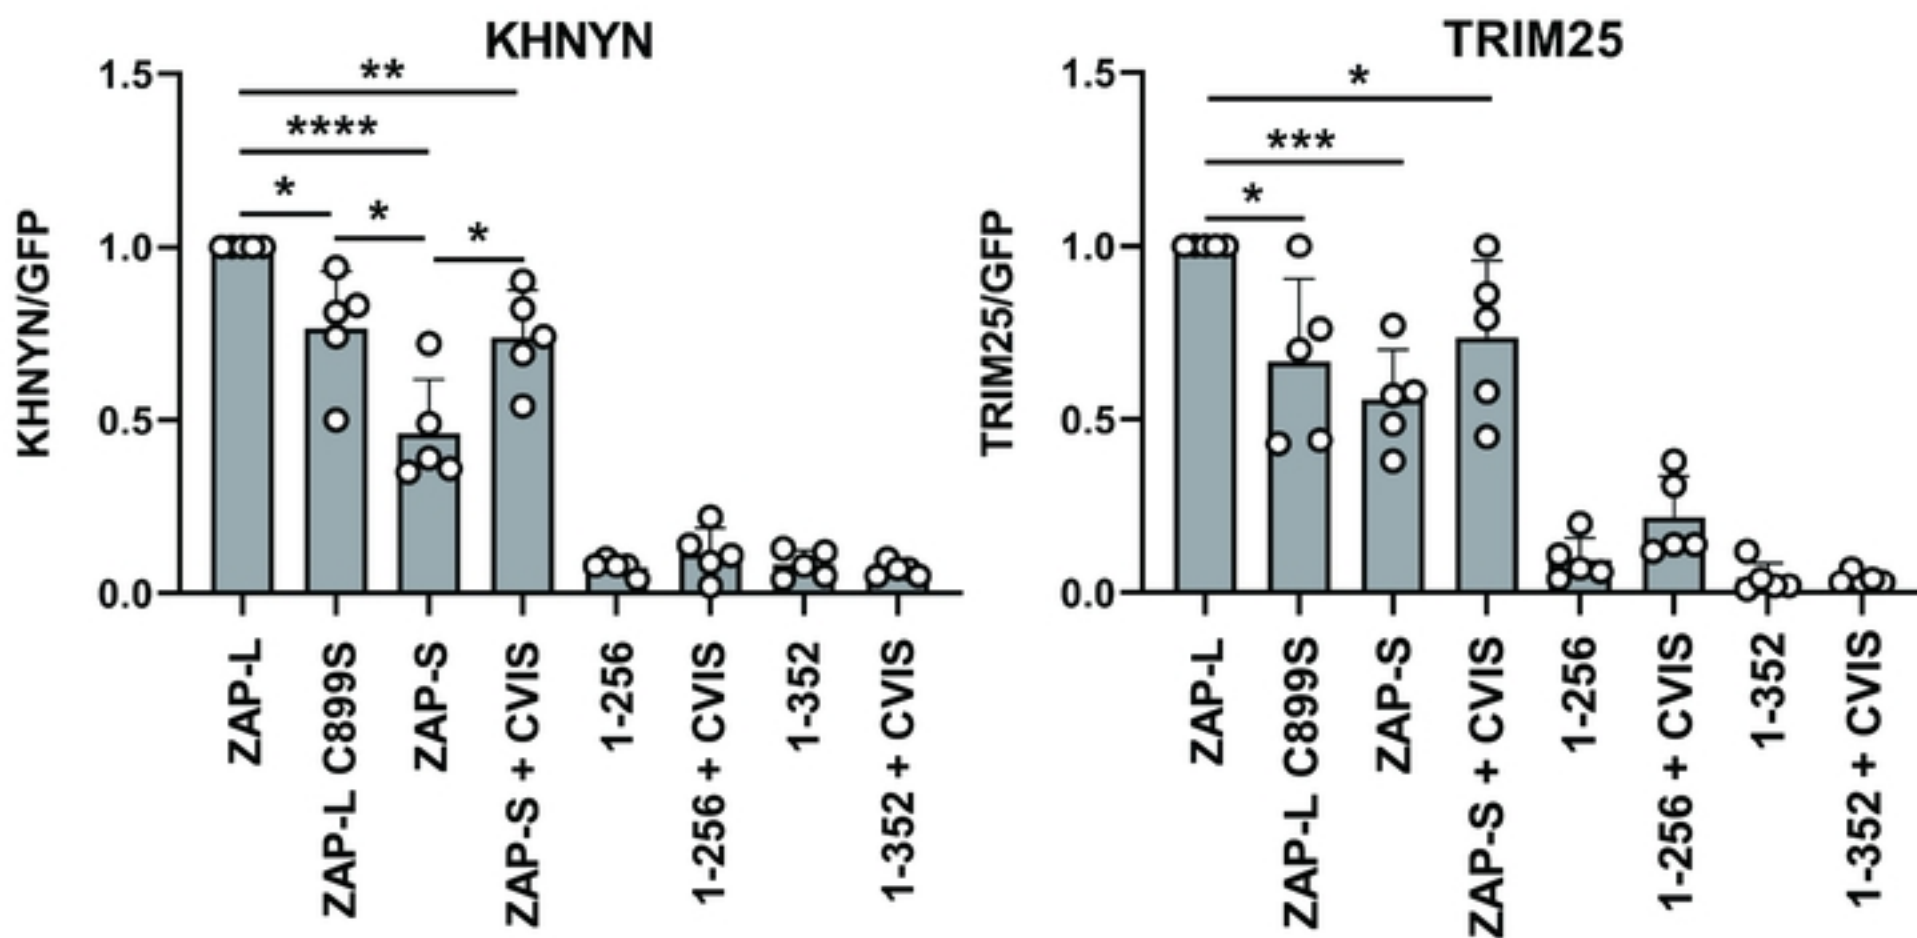

Fig 6

**A**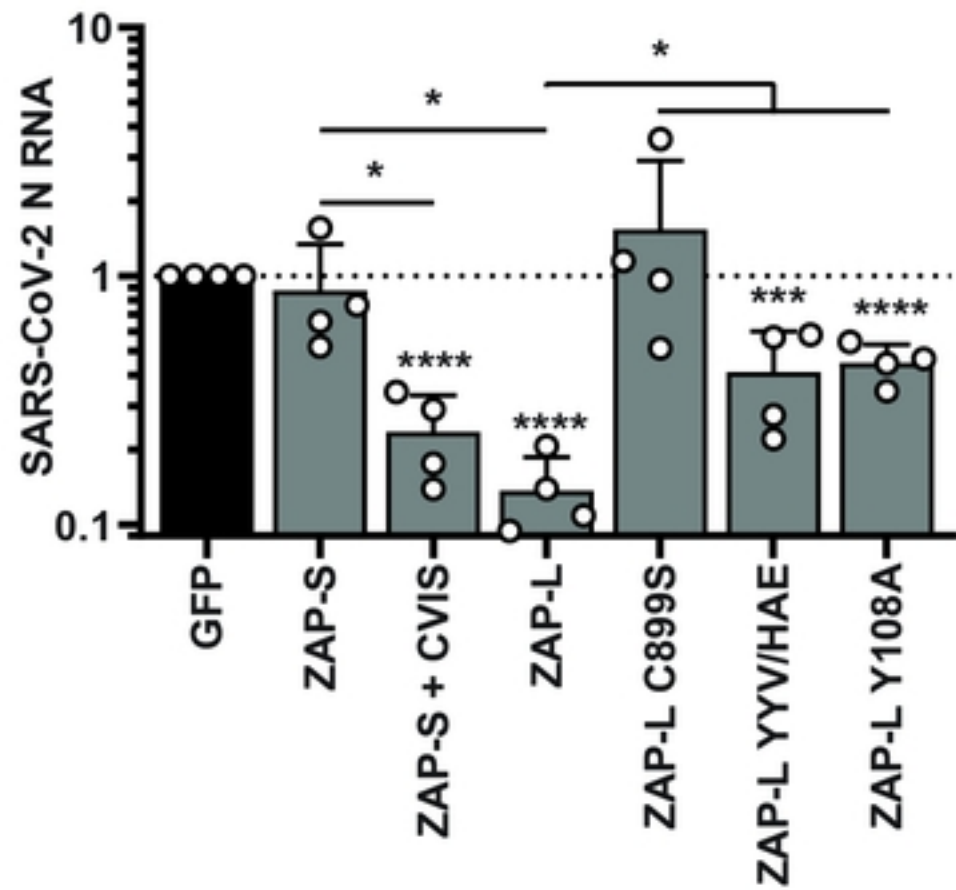**B**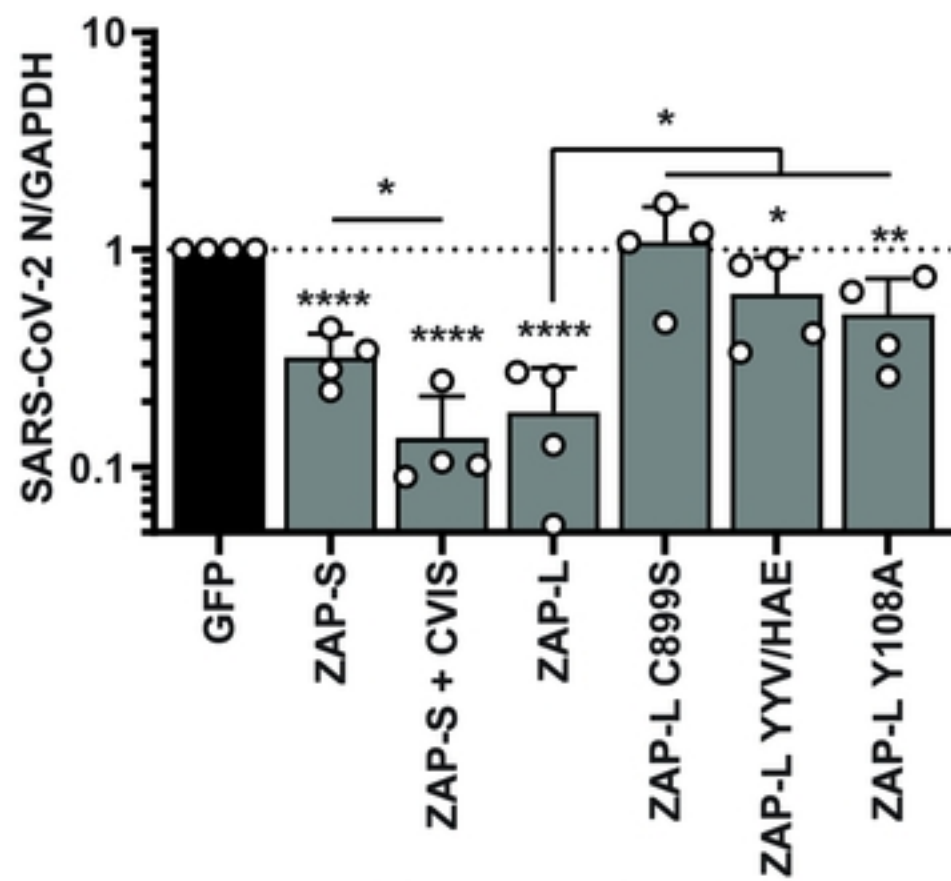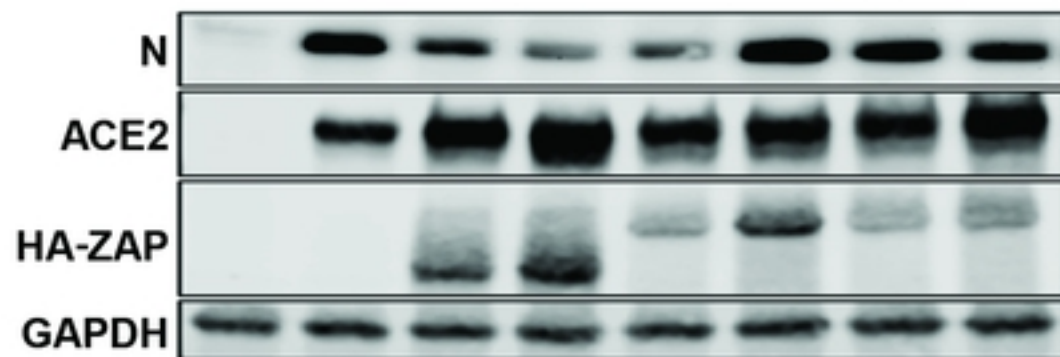

Fig 7
